# Supplementary material for: 3,5-Dicyanopyridine motifs for electron-transporting semiconductors: from design and synthesis to efficient organic light-emitting diodes
Source: Royal Society of Chemistry journal article supplement (doi:10.1039/d3tc00841j), 2023-01-01

## Supporting information

### **3,5-Dicyanopyridine motifs for electron-transporting semiconductors: from design and synthesis to efficient organic light-emitting diodes**

Karolis Leitonas,<sup>a</sup> Brigita Vigante,<sup>b</sup> Dmytro Volyniuk,<sup>a</sup> Audrius Bucinskas,<sup>a</sup> Rasa Keruckiene<sup>a</sup>,  
Pavels Dimitrijevs,<sup>b</sup> Tien-Lung Chiu<sup>c</sup>, Juozas Vidas Grazulevicius,<sup>\*a</sup> Pavel Arsenyan<sup>\*b</sup>

<sup>a</sup> *Department of Polymer Chemistry and Technology, Kaunas University of Technology, Baršausko Str. 59, LT-51423, Kaunas, Lithuania. e-mail: juozas.grazulevicius@ktu.lt*

<sup>b</sup> *Latvian Institute of Organic Synthesis, Aizkraukles 21, LV-1006, Riga, Latvia. e-mail: pavel@osi.lv*

<sup>c</sup> *Department of Electrical Engineering, Yuan Ze University, Taiwan. e-mail:*

*tlchiu@saturn.yzu.edu.tw*

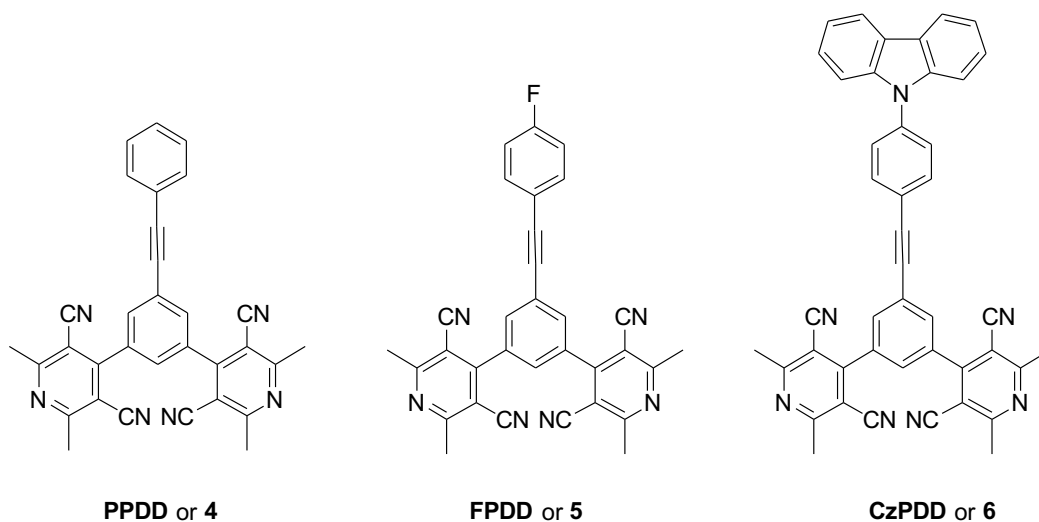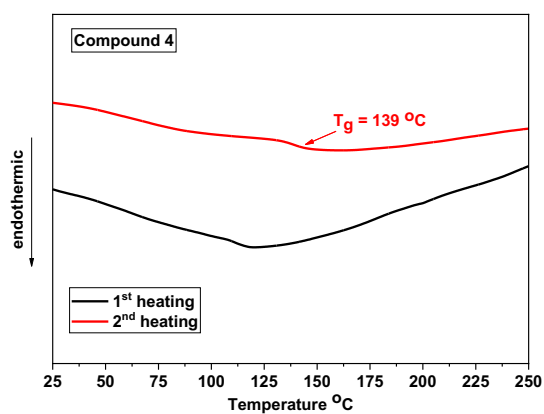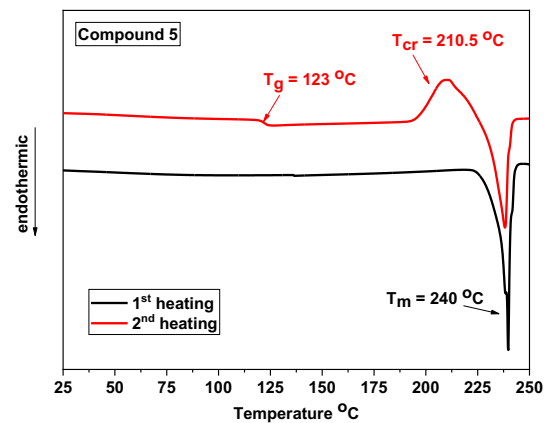

**Figure S1.** DSC thermograms of compounds **4** (a) and **5** (b).

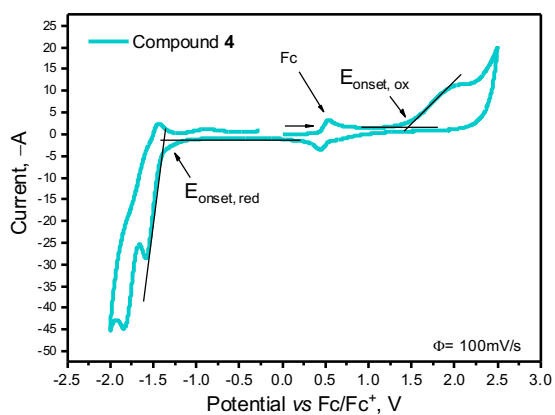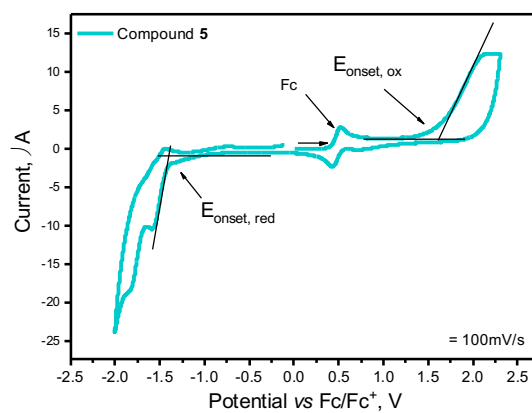

**Figure S2.** CV curves of the DCM solutions of **4** (a) and **5** (b).

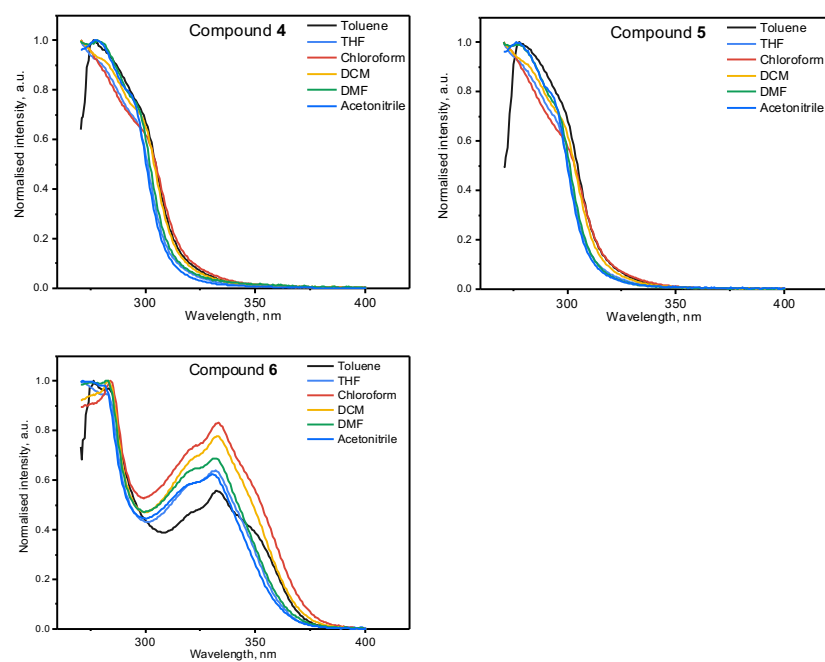

**Figure S3.** Normalised UV-VIS spectra of different polarity solutions of compounds **4**, **5** and **6**.

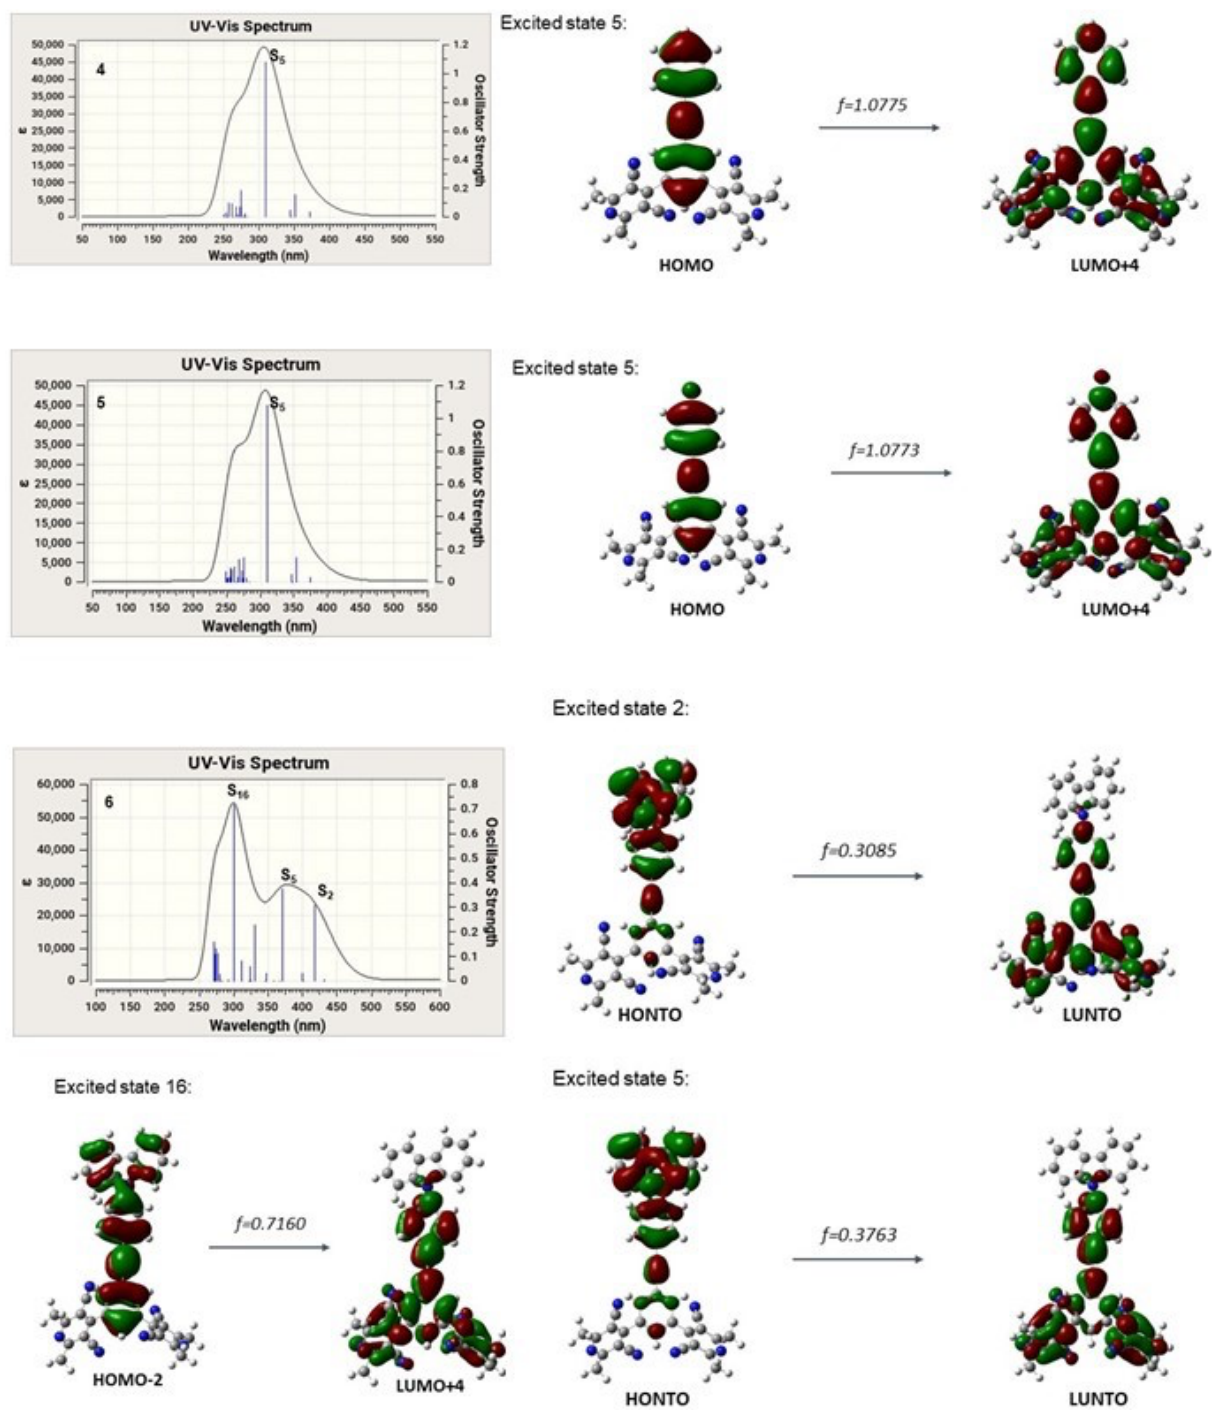

**Figure S4.** Theoretical UV spectra (in toluene) obtained from TD-DFT calculations of compounds 4–6.

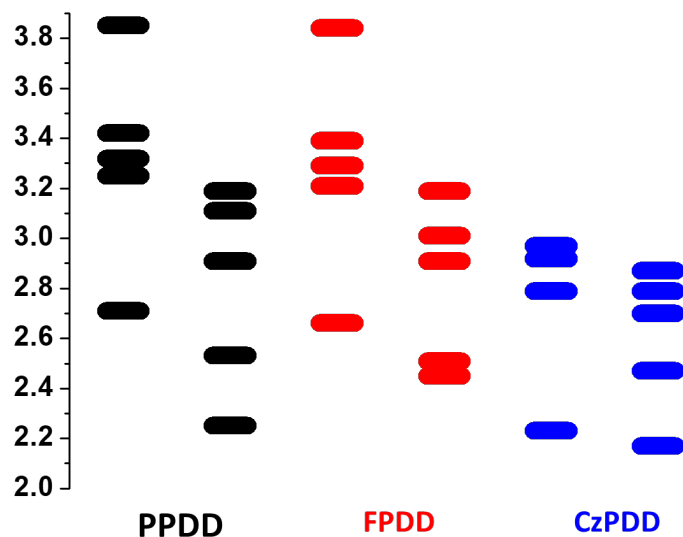

**Figure S5.** Energy diagrams of the first five singlet and triplet excited-states

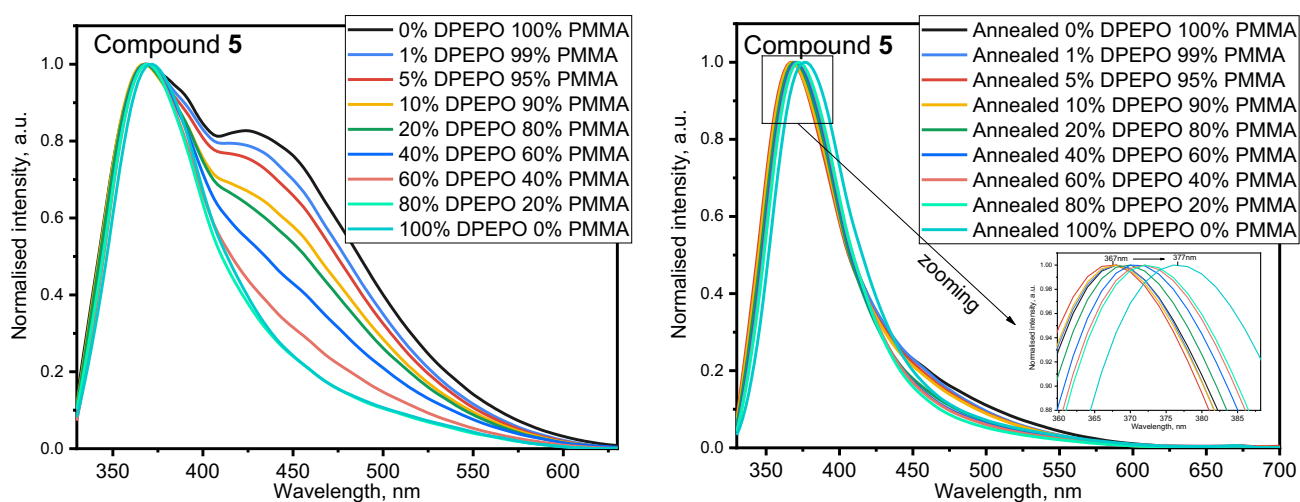

**Figure S6.** PL spectra of the dispersion of compound 5 in the host mixture of DPEPO and PMMA before and after annealing with the same concentration of the emitter and the different concentrations of the co-hosts DPEPO and PMMA.

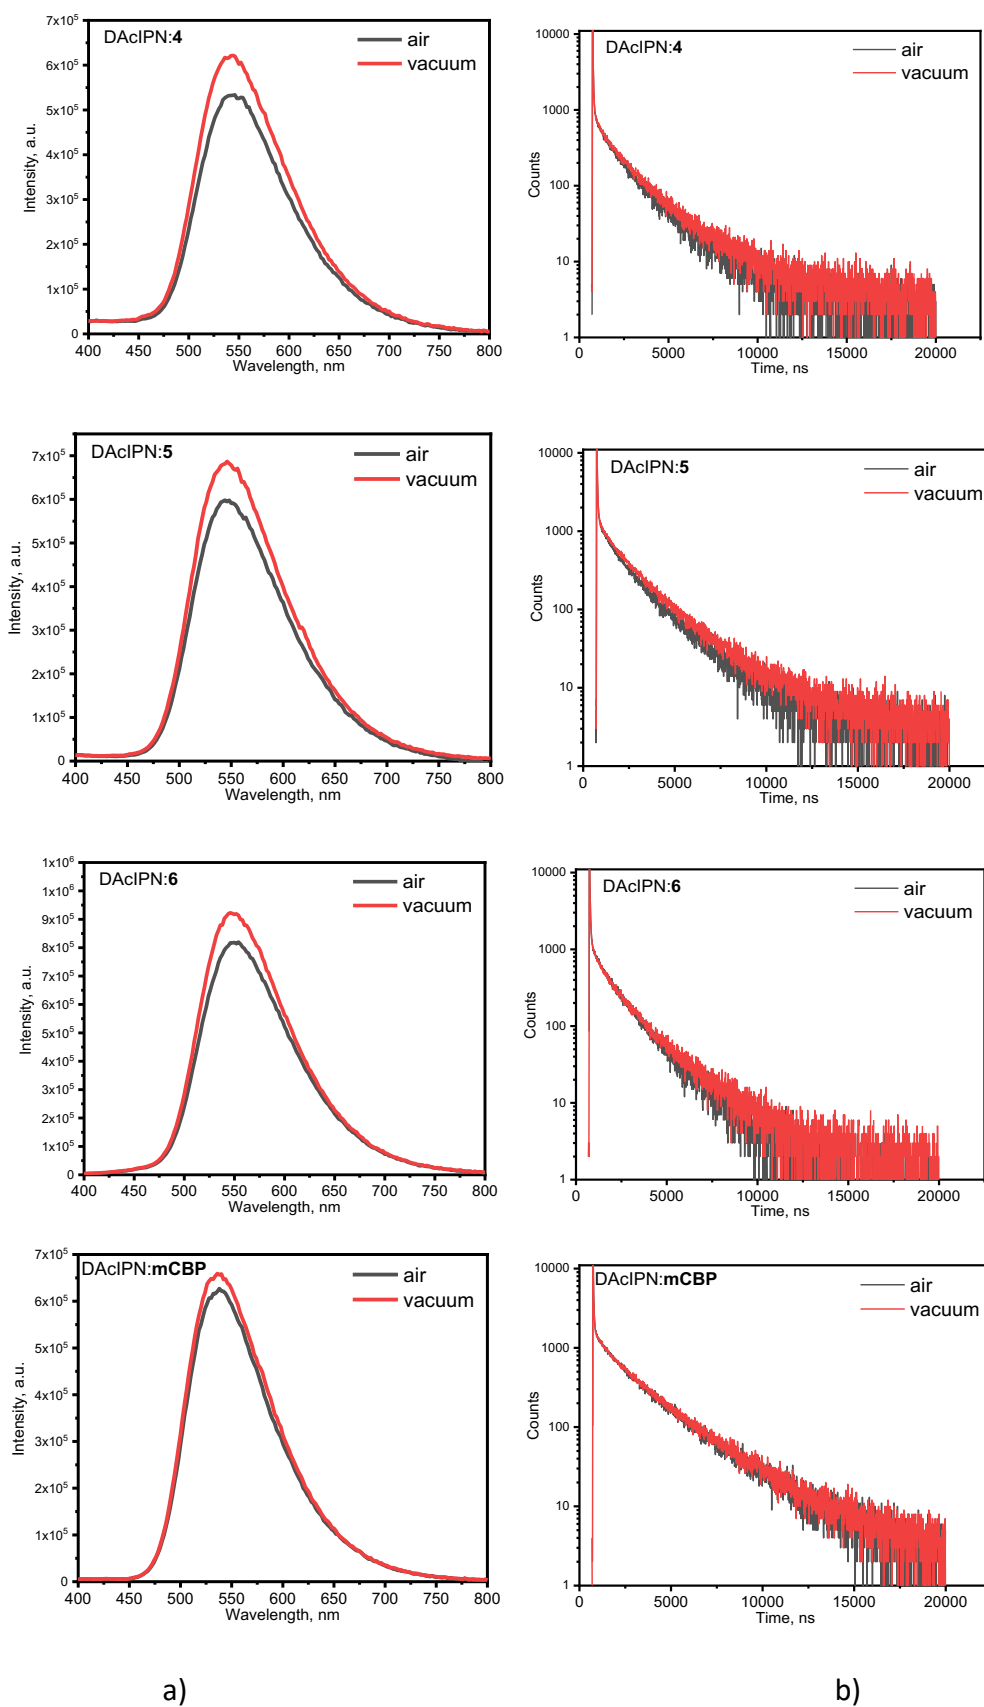

**Figure S7.** PL spectra (a) and PL decay curves (b) of DAclPN(10wt.%) in different hosts **4-6** and mCBP at air and vacuum.

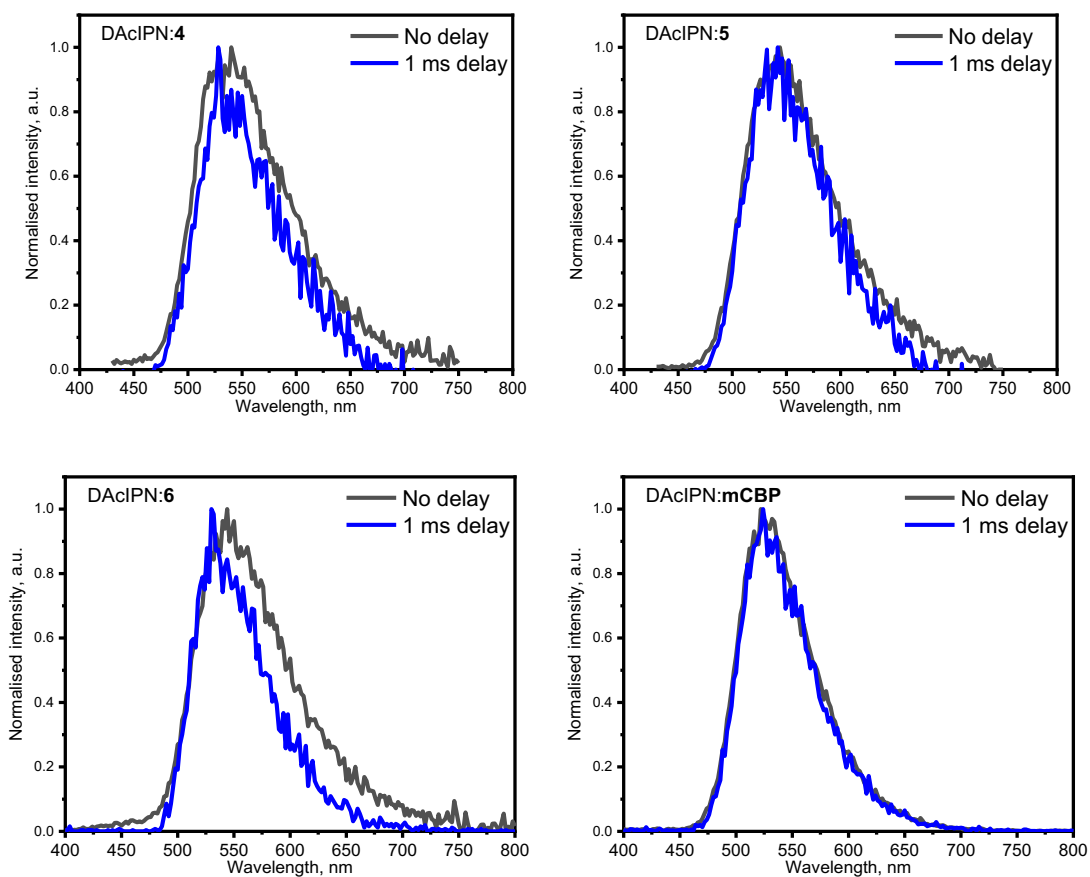

**Figure S8.** PL and phosphorescence spectra of DAciPN(10wt.%) in different hosts **4-6** and mCBP at 77K respectively recorded without and with 1 ms delay after excitation.

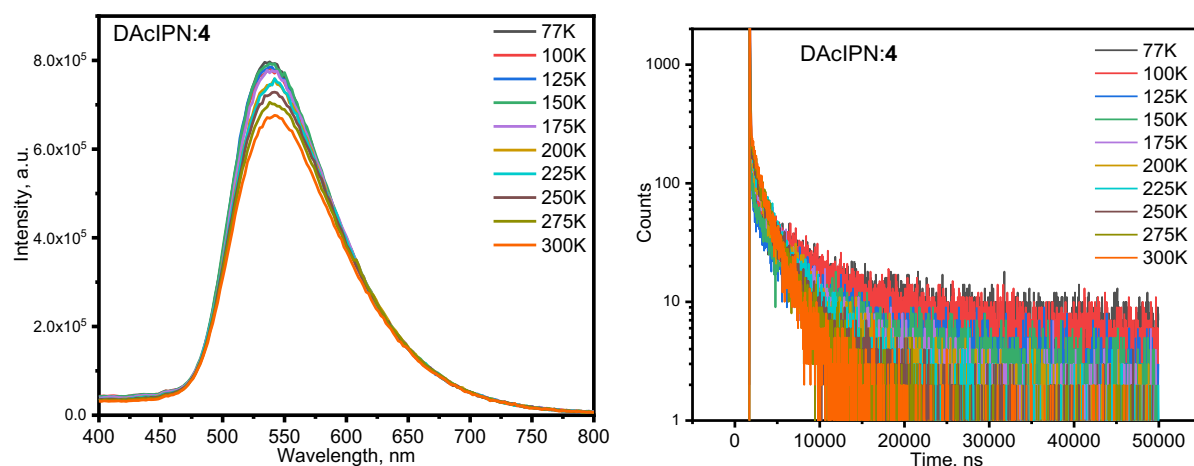

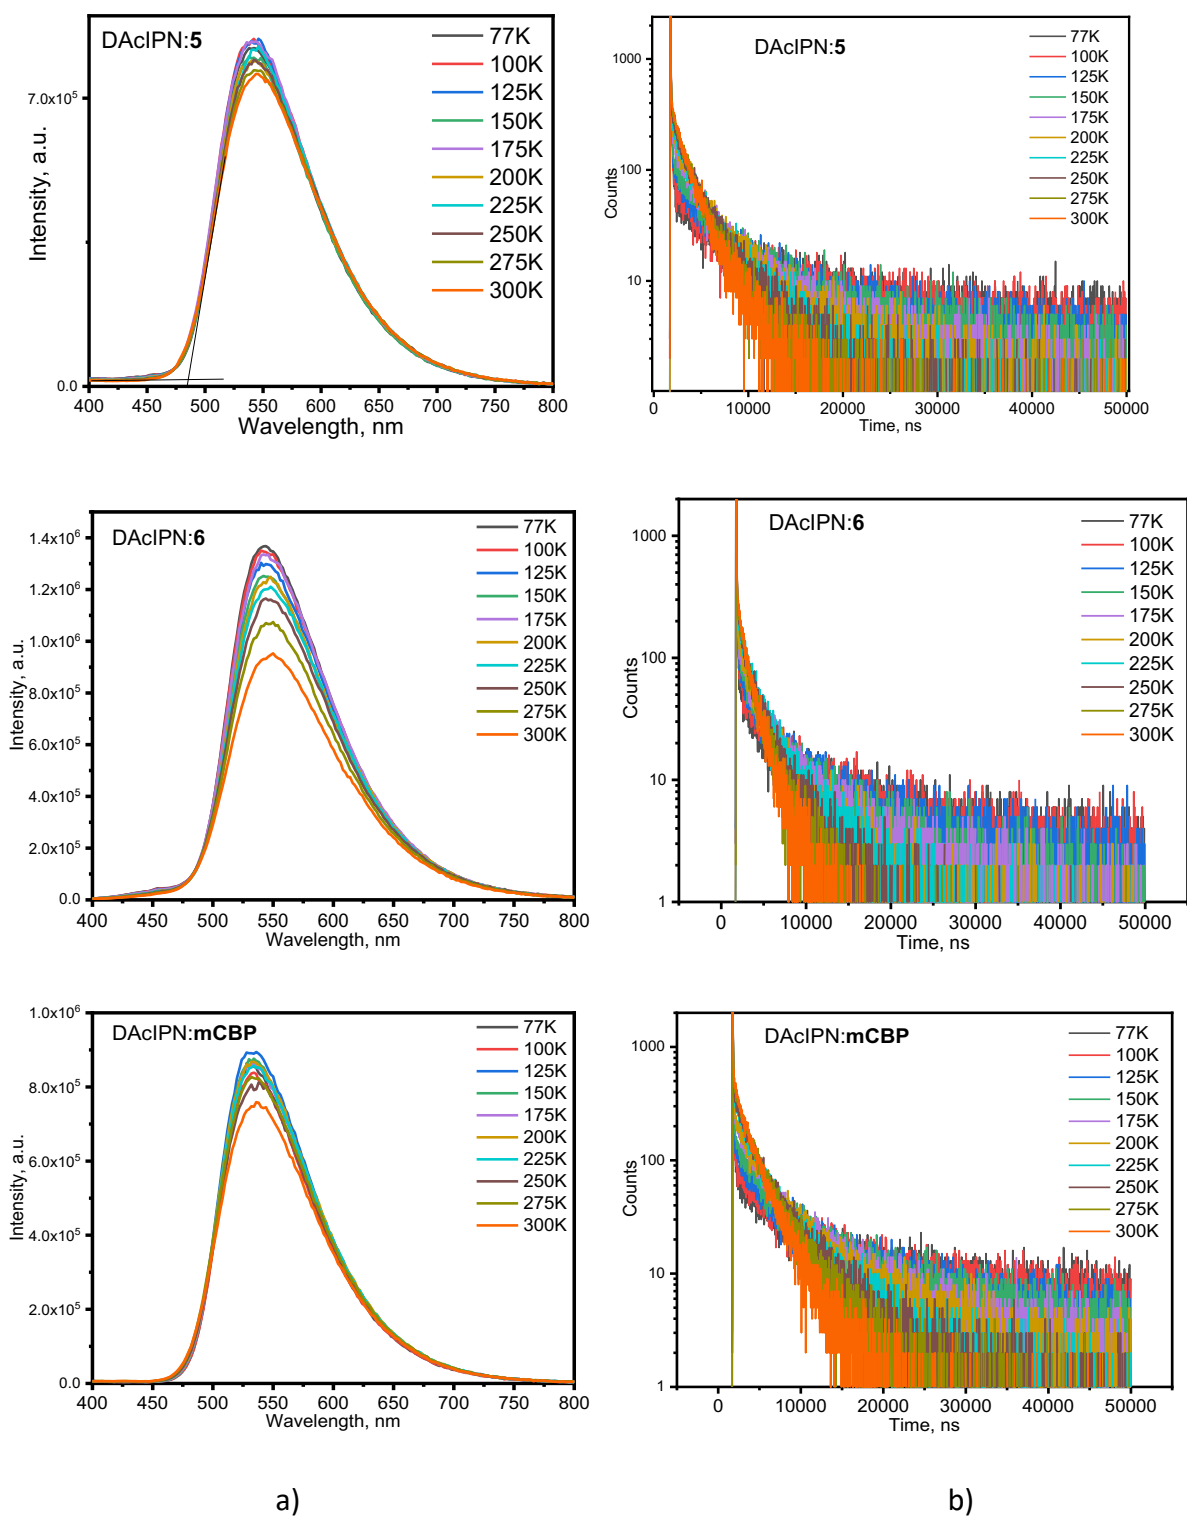

**Figure S9.** PL spectra (a) and PL decay curves (b) of DAclPN(10wt.%) in different hosts 4–6 and mCBP at different temperatures.



## TADF parameters of DAcIPN(10wt.%) in different hosts 4–6 and mCBP at different temperatures

To investigate TADF features of the DAcIPN(10wt.%) in hosts 4–6 and mCBP, the fitting of their PL decays were provided (Table S1–S4). Using that fitting, the radiation transition rate of the doped films of the compounds 2–5 was calculated using the formula shown below<sup>1</sup>:

$$k_{PF} = \frac{\Phi_{PF}}{\tau_{PF}}; \quad (1)$$

$$k_{ISC} = \frac{\Phi_{DF}}{\Phi_{PF} + \Phi_{DF}} k_{PF} \quad (2)$$

$$k_{DF} = \frac{\Phi_{DF}}{\tau_{DF}} \quad (3)$$

$$k_{RISC} = \frac{\Phi_{DF}}{\Phi_{PF}} \cdot \frac{k_{PF} \cdot k_{DF}}{k_{ISC}}; \quad (4)$$

where  $k_{PF}$ ,  $k_{DF}$ ,  $k_{ISC}$ , and  $k_{RISC}$  are rate constants of prompt and delayed components, intersystem crossing (ISC) and RISC processes, respectively;  $\Phi_{PF}$  and  $\Phi_{DF}$  are prompt and delayed PLQYs was distinguished from the total PLQY ( $\Phi_{N2}$ ) by comparing the integrated intensity of the prompt and delayed components in the transient photoluminescence spectra (Table S1–S4). The obtained rate constants for **PHhA:ZEONEX** and **bPHhA:ZEONEX** are collected in Table S1–S4.

**Table S1.** The fitting parameters of PL decay curves of the film DAcIPN(10wt.%):**4** recorded at the different temperatures.

| T, K | 1/T    | $\tau_{PF}$ , ns | $\tau_{DF}$ , ns | $\Phi_{N2}$ , % | $\Phi_{PF}$ , % | $\Phi_{DF}$ , % | $k_{PF}$ , s <sup>-1</sup> | $k_{DF}$ , s <sup>-1</sup> | $k_{ISC}$ , s <sup>-1</sup> | $k_{RISC}$ , s <sup>-1</sup> |
|------|--------|------------------|------------------|-----------------|-----------------|-----------------|----------------------------|----------------------------|-----------------------------|------------------------------|
| 300  | 0.0033 | 29.25            | 1382.93          | 18.64           | 10.66           | 7.98            | 3.64E+06                   | 5.77E+04                   | 1.56E+06                    | 1.01E+05                     |
| 275  | 0.0036 | 31.83            | 1577.83          | 18.22           | 10.27           | 7.94            | 3.23E+06                   | 5.03E+04                   | 1.41E+06                    | 8.92E+04                     |
| 250  | 0.0040 | 33.80            | 1746.32          | 17.02           | 9.69            | 7.32            | 2.87E+06                   | 4.19E+04                   | 1.23E+06                    | 7.36E+04                     |
| 225  | 0.0044 | 36.95            | 1962.61          | 17.64           | 9.73            | 7.91            | 2.63E+06                   | 4.03E+04                   | 1.18E+06                    | 7.31E+04                     |
| 200  | 0.0050 | 35.20            | 2131.49          | 15.86           | 9.42            | 6.44            | 2.68E+06                   | 3.02E+04                   | 1.09E+06                    | 5.09E+04                     |
| 175  | 0.0057 | 35.35            | 2118.69          | 15.69           | 9.39            | 6.30            | 2.66E+06                   | 2.97E+04                   | 1.07E+06                    | 4.97E+04                     |
| 150  | 0.0067 | 40.56            | 2577.92          | 10.62           | 7.12            | 3.50            | 1.75E+06                   | 1.36E+04                   | 5.79E+05                    | 2.03E+04                     |
| 125  | 0.0080 | 41.4513          | 2960.6785        | 9.66            | 6.70            | 2.95            | 1.62E+06                   | 9.97E+03                   | 4.94E+05                    | 1.44E+04                     |
| 100  | 0.0100 | 42.64526         | 2690.2848        | 7.37            | 5.49            | 1.88            | 1.29E+06                   | 6.99E+03                   | 3.29E+05                    | 9.39E+03                     |
| 77   | 0.0130 | 43.82709         | 2393.023         | 6.10            | 4.75            | 1.35            | 1.08E+06                   | 5.65E+03                   | 2.40E+05                    | 7.27E+03                     |

**Table S2.** The fitting parameters of PL decay curves of the film DAcIPN(10wt.):5 recorded at the different temperatures.

| 1/T    | $\tau_{PF}$ , ns | $\tau_{DF}$ , ns | $\Phi_{N2}$ , % | $\Phi_{PF}$ , % | $\Phi_{DF}$ , % | kPF, s <sup>-1</sup> | kDF, s <sup>-1</sup> | kISC, s <sup>-1</sup> | kRISC, s <sup>-1</sup> |
|--------|------------------|------------------|-----------------|-----------------|-----------------|----------------------|----------------------|-----------------------|------------------------|
| 0.0033 | 32.59            | 1518.02          | 37.91           | 6.13            | 31.77           | 1.88E+06             | 2.09E+05             | 1.58E+06              | 1.29E+06               |
| 0.0036 | 34.42            | 1702.64          | 37.91           | 6.57            | 31.34           | 1.91E+06             | 1.84E+05             | 1.58E+06              | 1.06E+06               |
| 0.0040 | 35.33            | 1930.60          | 36.08           | 6.79            | 29.29           | 1.92E+06             | 1.52E+05             | 1.56E+06              | 8.06E+05               |
| 0.0044 | 35.04            | 2089.62          | 33.22           | 6.90            | 26.32           | 1.97E+06             | 1.26E+05             | 1.56E+06              | 6.06E+05               |
| 0.0050 | 36.61            | 2445.03          | 32.58           | 7.49            | 25.09           | 2.05E+06             | 1.03E+05             | 1.58E+06              | 4.47E+05               |
| 0.0057 | 37.78            | 2683.15          | 30.03           | 7.71            | 22.32           | 2.04E+06             | 8.32E+04             | 1.52E+06              | 3.24E+05               |
| 0.0067 | 42.93            | 3128.68          | 24.65           | 7.52            | 17.13           | 1.75E+06             | 5.48E+04             | 1.22E+06              | 1.80E+05               |
| 0.0080 | 46.36367         | 3371.5696        | 21.30           | 7.19            | 14.11           | 1.55E+06             | 4.19E+04             | 1.03E+06              | 1.24E+05               |
| 0.0100 | 47.98664         | 3590.6633        | 16.58           | 6.84            | 9.74            | 1.43E+06             | 2.71E+04             | 8.37E+05              | 6.58E+04               |
| 0.0130 | 48.78793         | 3634.581         | 14.42           | 6.57            | 7.85            | 1.35E+06             | 2.16E+04             | 7.33E+05              | 4.74E+04               |

**Table S3.** The fitting parameters of PL decay curves of the film DAcIPN(10wt.):6 recorded at the different temperatures.

| T, K | 1/T    | $\tau_{PF}$ , ns | $\tau_{DF}$ , ns | $\Phi_{N2}$ , % | $\Phi_{PF}$ , % | $\Phi_{DF}$ , % | kPF, s <sup>-1</sup> | kDF, s <sup>-1</sup> | kISC, s <sup>-1</sup> | kRISC, s <sup>-1</sup> |
|------|--------|------------------|------------------|-----------------|-----------------|-----------------|----------------------|----------------------|-----------------------|------------------------|
| 300  | 0.0033 | 29.54            | 1080.23          | 21.39           | 5.30            | 16.09           | 1.79E+06             | 1.49E+05             | 1.35E+06              | 6.01E+05               |
| 275  | 0.0036 | 31.78            | 1205.07          | 20.74           | 5.24            | 15.50           | 1.65E+06             | 1.29E+05             | 1.23E+06              | 5.09E+05               |
| 250  | 0.0040 | 35.29            | 1449.34          | 20.64           | 5.75            | 14.89           | 1.63E+06             | 1.03E+05             | 1.18E+06              | 3.69E+05               |
| 225  | 0.0044 | 33.52            | 1743.79          | 22.48           | 6.22            | 16.27           | 1.85E+06             | 9.33E+04             | 1.34E+06              | 3.37E+05               |
| 200  | 0.0050 | 36.22            | 1841.63          | 21.11           | 6.30            | 14.82           | 1.74E+06             | 8.04E+04             | 1.22E+06              | 2.70E+05               |
| 175  | 0.0057 | 40.83            | 2207.95          | 17.45           | 6.17            | 11.28           | 1.51E+06             | 5.11E+04             | 9.77E+05              | 1.44E+05               |
| 150  | 0.0067 | 37.15            | 2111.91          | 15.74           | 6.11            | 9.64            | 1.64E+06             | 4.56E+04             | 1.01E+06              | 1.18E+05               |
| 125  | 0.0080 | 43.51603         | 2624.6172        | 14.03           | 6.00            | 8.03            | 1.38E+06             | 3.06E+04             | 7.89E+05              | 7.15E+04               |
| 100  | 0.0100 | 44.23426         | 2675.7764        | 12.31           | 5.80            | 6.51            | 1.31E+06             | 2.43E+04             | 6.93E+05              | 5.17E+04               |
| 77   | 0.0130 | 46.86233         | 2525.9469        | 9.64            | 5.17            | 4.47            | 1.10E+06             | 1.77E+04             | 5.12E+05              | 3.30E+04               |

**Table S4.** The fitting parameters of PL decay curves of the film DAcIPN(10wt.):mCBP recorded at the different temperatures.

| T, K | 1/T    | $\tau_{PF}$ , ns | $\tau_{DF}$ , ns | $\Phi_{N2}$ , % | $\Phi_{PF}$ , % | $\Phi_{DF}$ , % | kPF, s <sup>-1</sup> | kDF, s <sup>-1</sup> | kISC, s <sup>-1</sup> | kRISC, s <sup>-1</sup> |
|------|--------|------------------|------------------|-----------------|-----------------|-----------------|----------------------|----------------------|-----------------------|------------------------|
| 300  | 0.0033 | 33.68            | 1826.92          | 35.74           | 3.63            | 32.11           | 1.08E+06             | 1.76E+05             | 9.68E+05              | 1.73E+06               |
| 275  | 0.0036 | 35.92            | 2130.32          | 35.56           | 4.10            | 31.46           | 1.14E+06             | 1.48E+05             | 1.01E+06              | 1.28E+06               |
| 250  | 0.0040 | 36.34            | 2434.04          | 33.99           | 4.37            | 29.61           | 1.20E+06             | 1.22E+05             | 1.05E+06              | 9.45E+05               |
| 225  | 0.0044 | 37.97            | 2561.12          | 32.08           | 4.43            | 27.65           | 1.17E+06             | 1.08E+05             | 1.01E+06              | 7.82E+05               |
| 200  | 0.0050 | 41.96            | 3162.64          | 28.35           | 4.74            | 23.60           | 1.13E+06             | 7.46E+04             | 9.42E+05              | 4.46E+05               |
| 175  | 0.0057 | 42.64            | 3347.65          | 26.86           | 4.84            | 22.02           | 1.13E+06             | 6.58E+04             | 9.30E+05              | 3.65E+05               |
| 150  | 0.0067 | 45.92            | 3952.84          | 21.65           | 5.01            | 16.64           | 1.09E+06             | 4.21E+04             | 8.38E+05              | 1.82E+05               |
| 125  | 0.0080 | 47.9508          | 4284.0919        | 17.91           | 4.58            | 13.33           | 9.54E+05             | 3.11E+04             | 7.11E+05              | 1.22E+05               |
| 100  | 0.0100 | 47.77659         | 4498.1135        | 14.17           | 4.77            | 9.40            | 9.98E+05             | 2.09E+04             | 6.62E+05              | 6.21E+04               |
| 77   | 0.0130 | 49.93294         | 4909.0628        | 12.64           | 4.54            | 8.10            | 9.10E+05             | 1.65E+04             | 5.83E+05              | 4.59E+04               |

**Table S5.** The activation energy of ISC and RISC processes of DAciPN(10wt.%) dispersed in different hosts.

|                           | DAciPN:4 | DAciPN:5 | DAciPN:6 | DAciPN:mCBP |
|---------------------------|----------|----------|----------|-------------|
| $\Delta E_A^{RISC}$ , meV | 26       | 31       | 27       | 34          |
| $\Delta E_A^{ISC}$ , meV  | 18       | 8        | 9        | 6           |

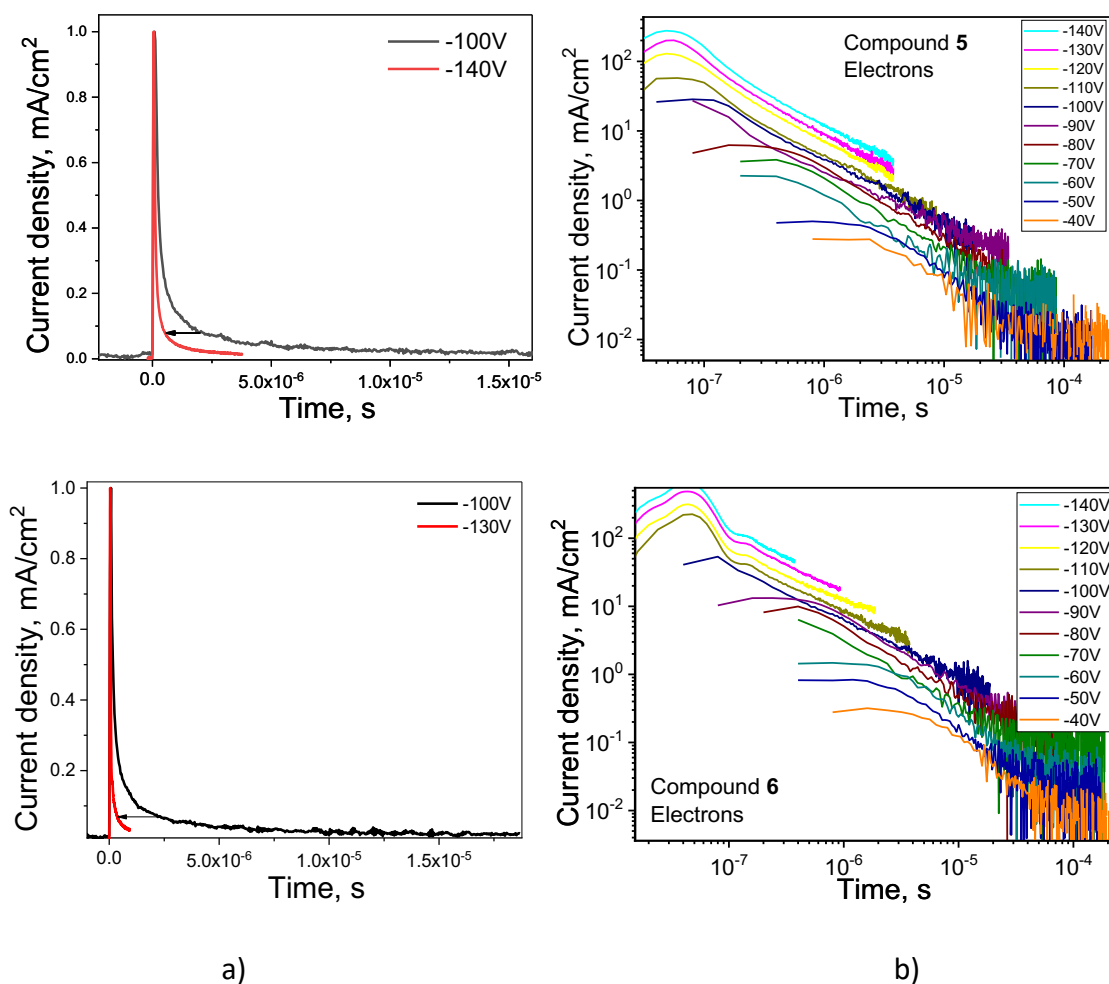

**Figure S10.** TOF signals at different voltages for electrons in films of **5** and **6** in linear (a) and log-log scales (b).

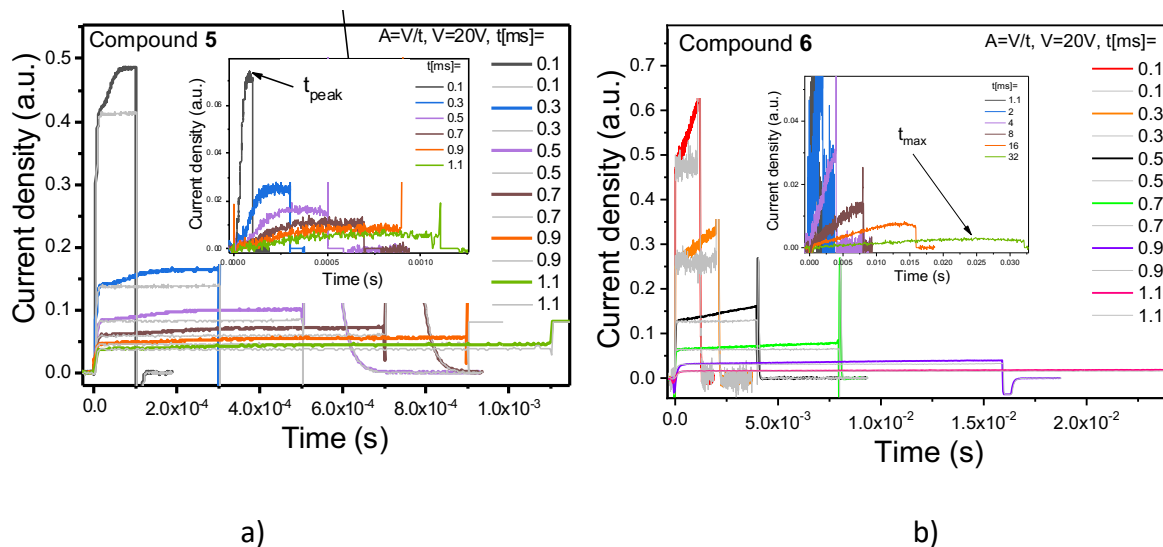

**Figure S11.** Dark-CELIV (grey curves) and photo-CELIV (colour curves) signals at different voltages for electrons in films of **5** (a) and **6** (b). Insets: result of subtraction of dark-CELIV from photo-CELIV signals.

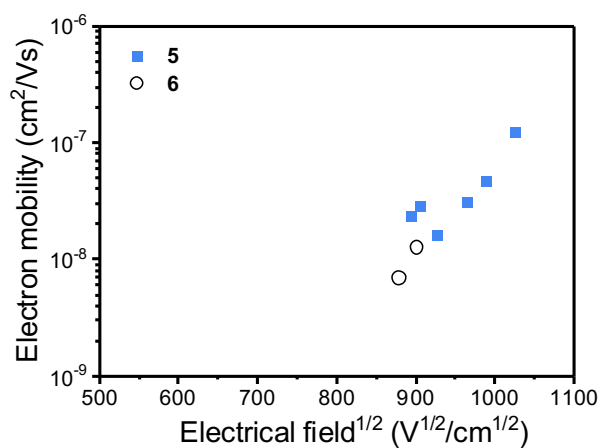

**Figure S12.** Dependences of electron drift mobilities versus electric field for compounds **5** and **6**

#### References:

- 1 C. Han, Z. Zhang, D. Ding and H. Xu, *Chem*, 2018, **4**, 2154–2167.

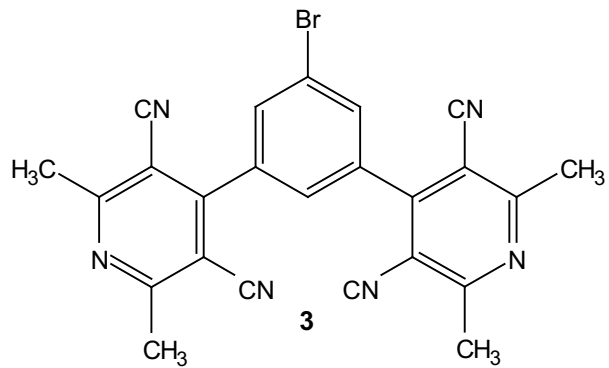

7.91  
7.90  
7.61  
7.61  
7.60  
7.26

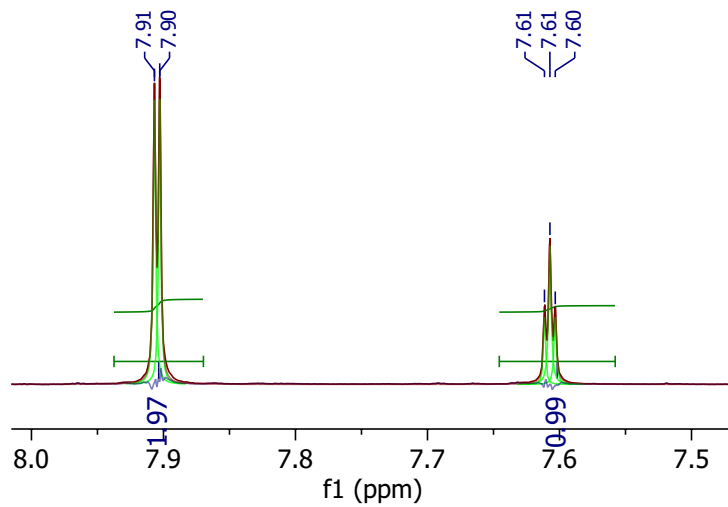

∫ ∫

1.97

0.99

2.89

2.17

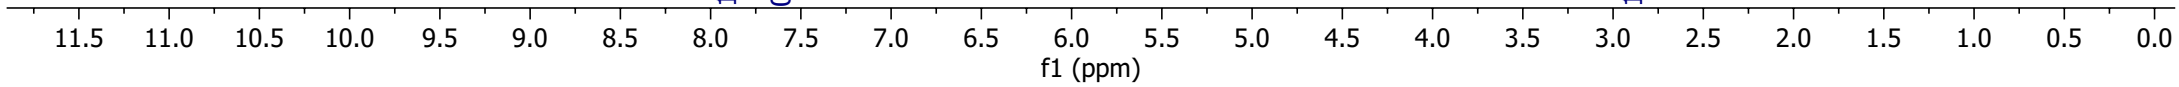

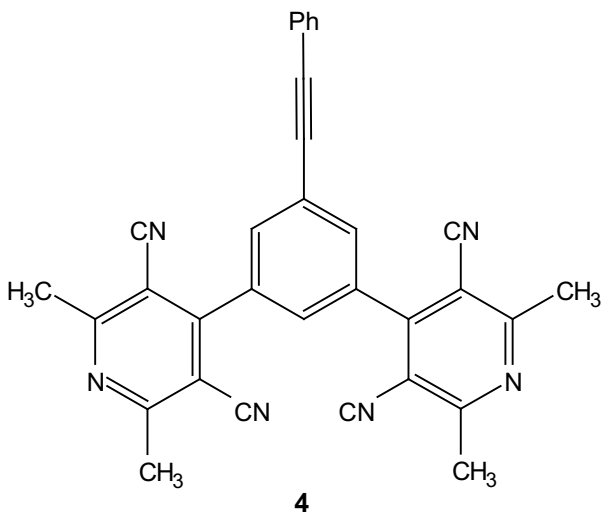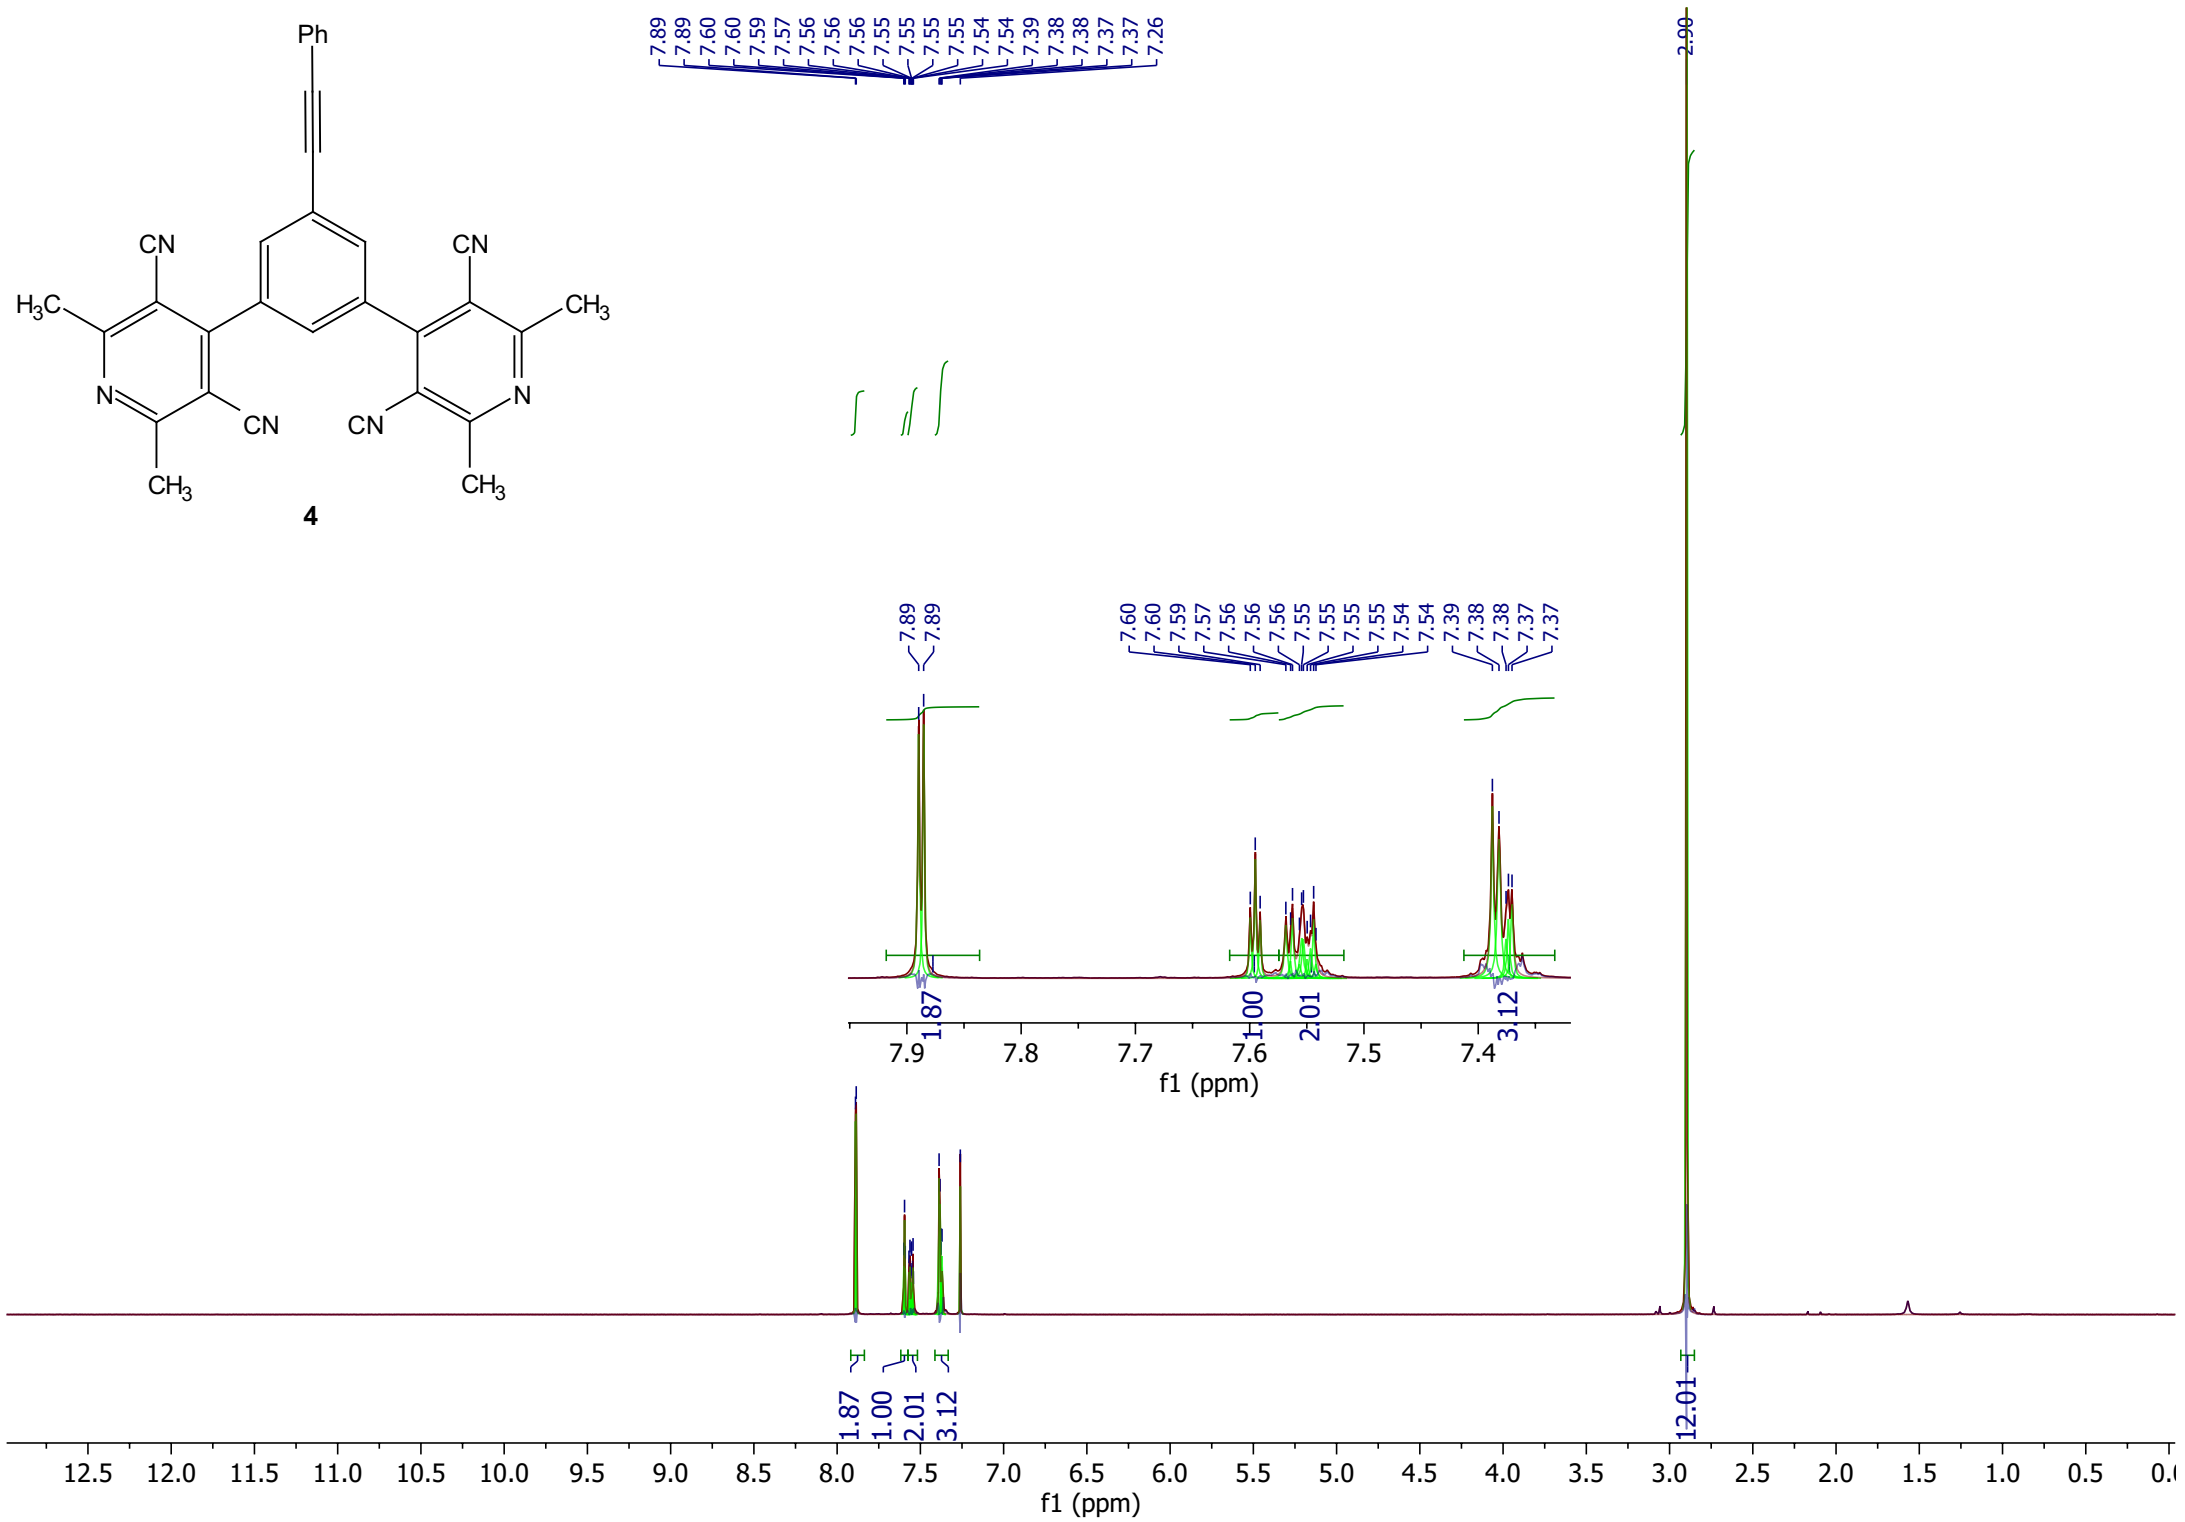

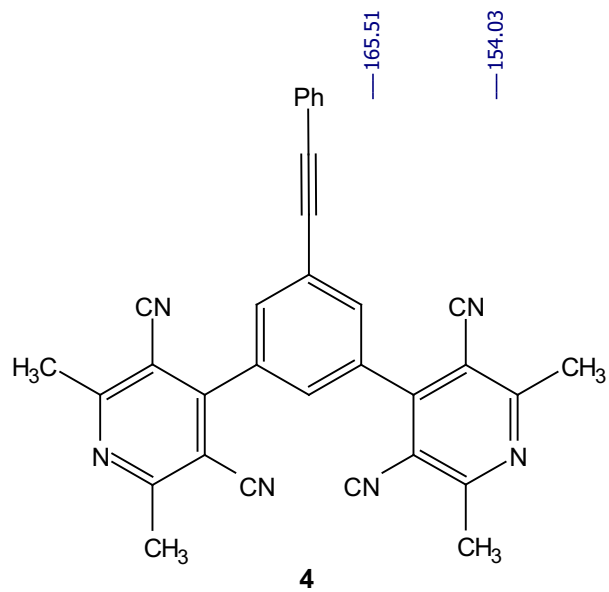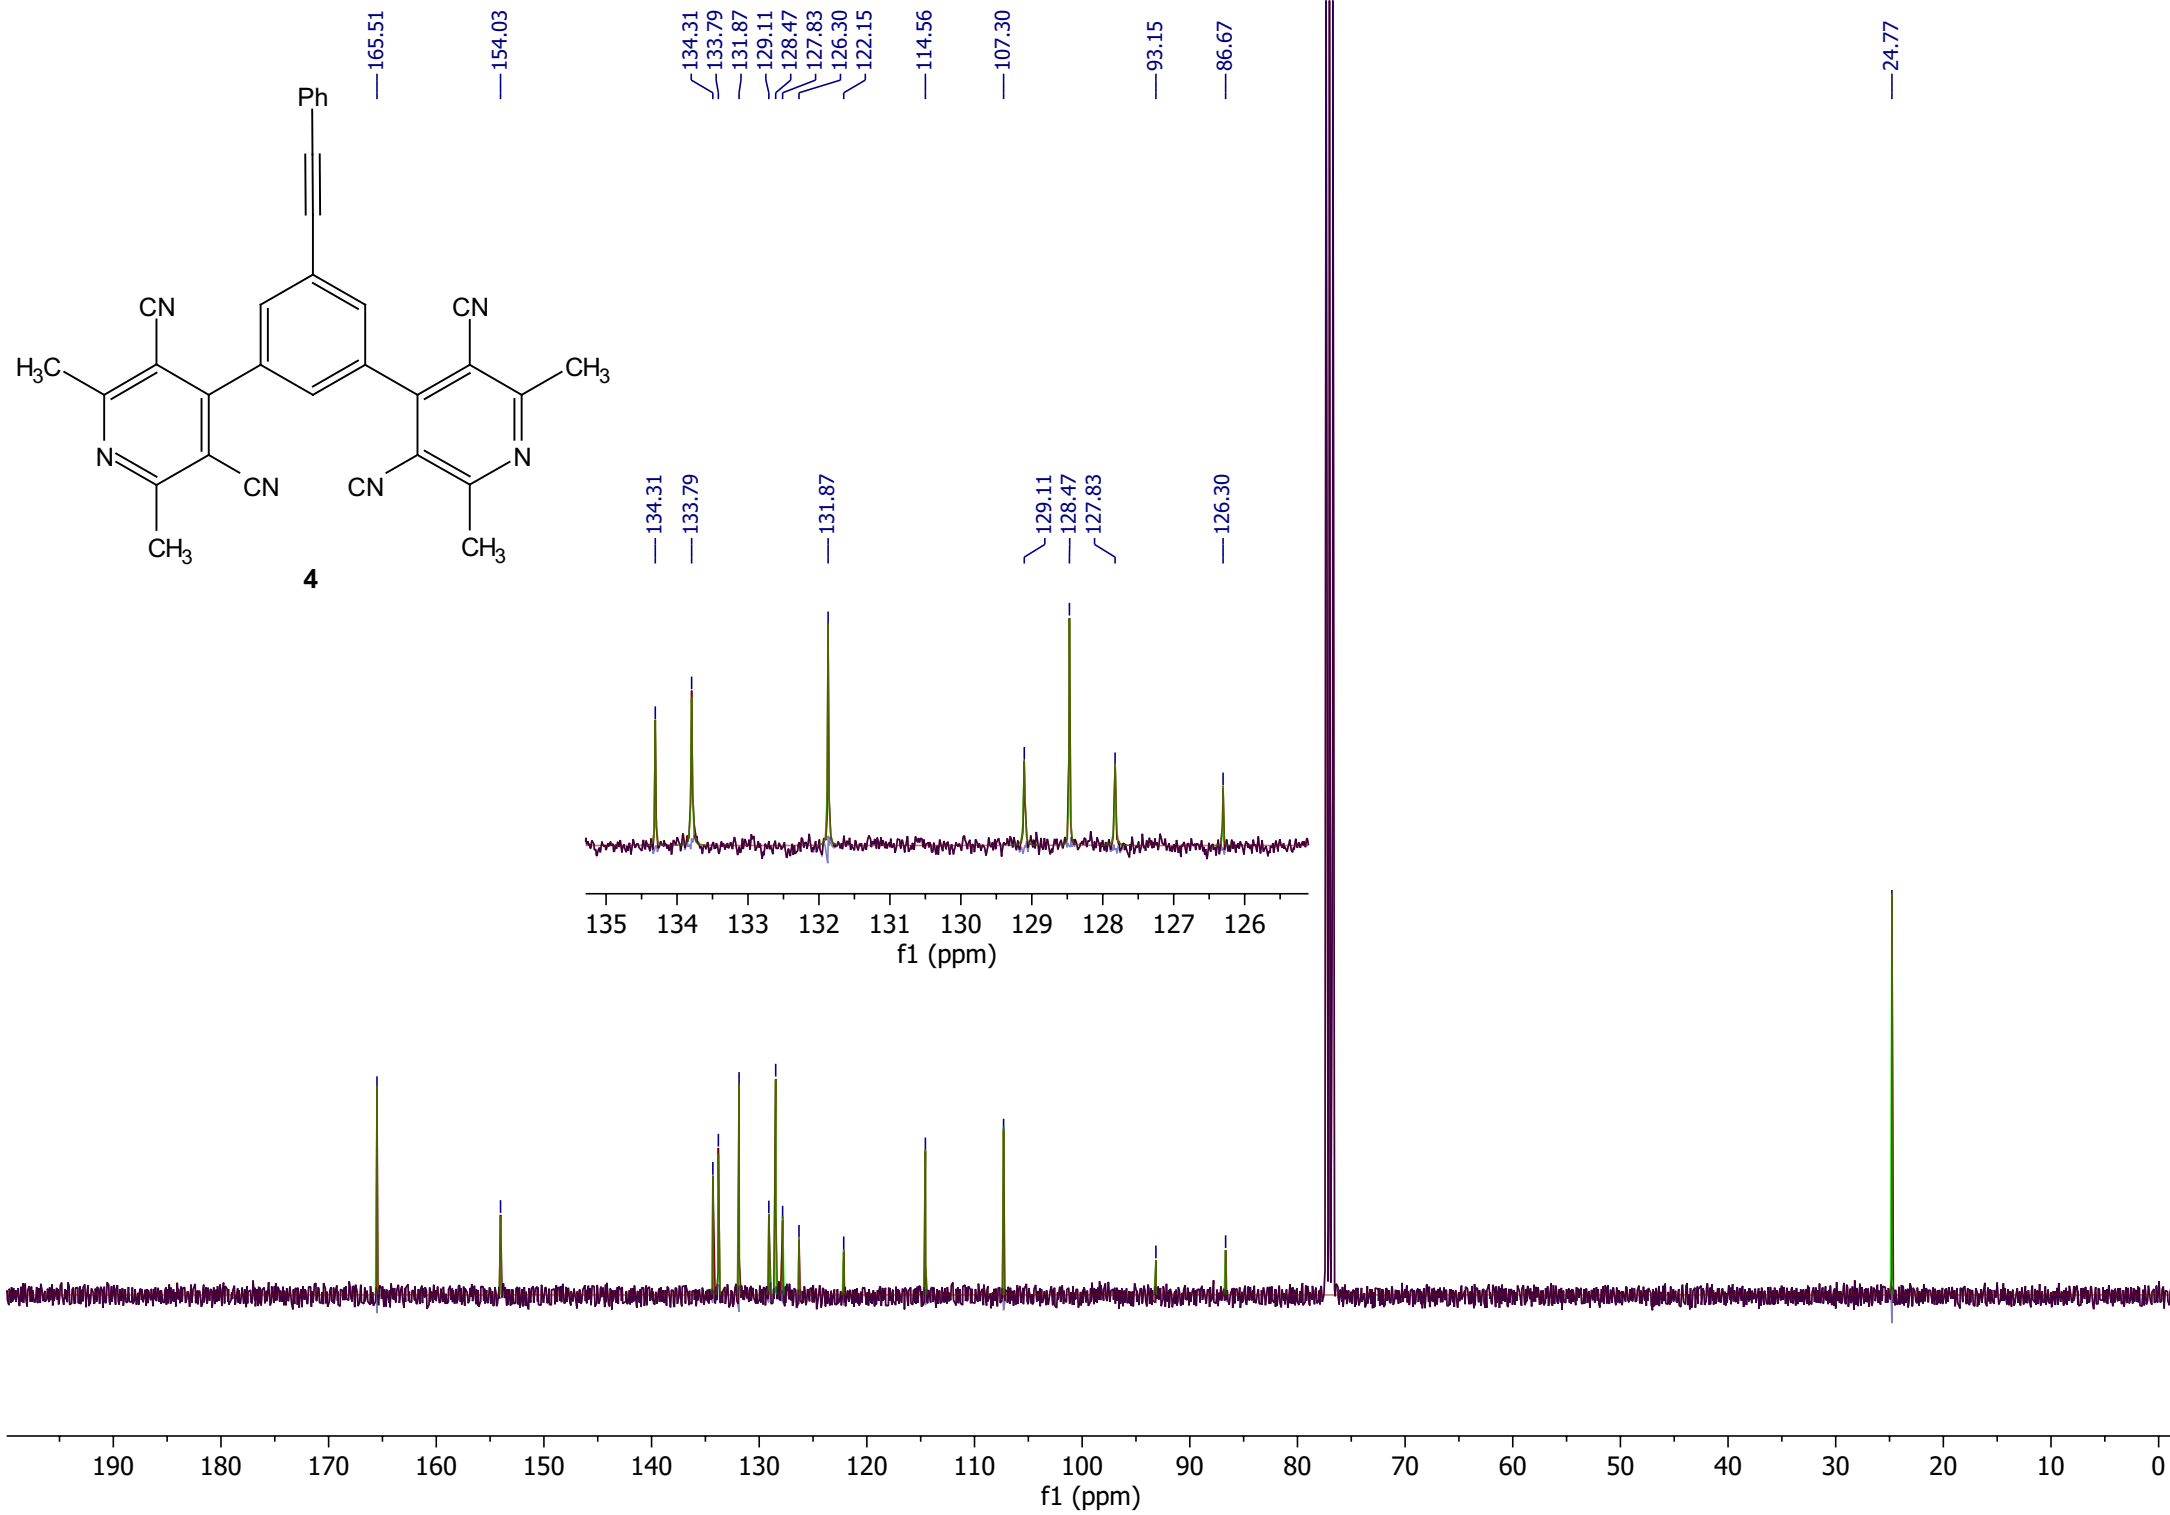

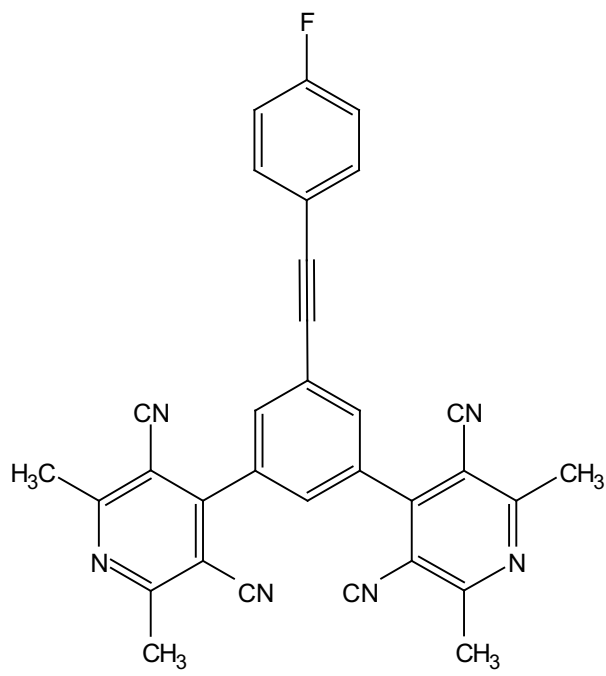

5

7.87  
7.87  
7.60  
7.60  
7.59  
7.56  
7.54  
7.53  
7.52  
7.26  
7.10  
7.07  
7.05

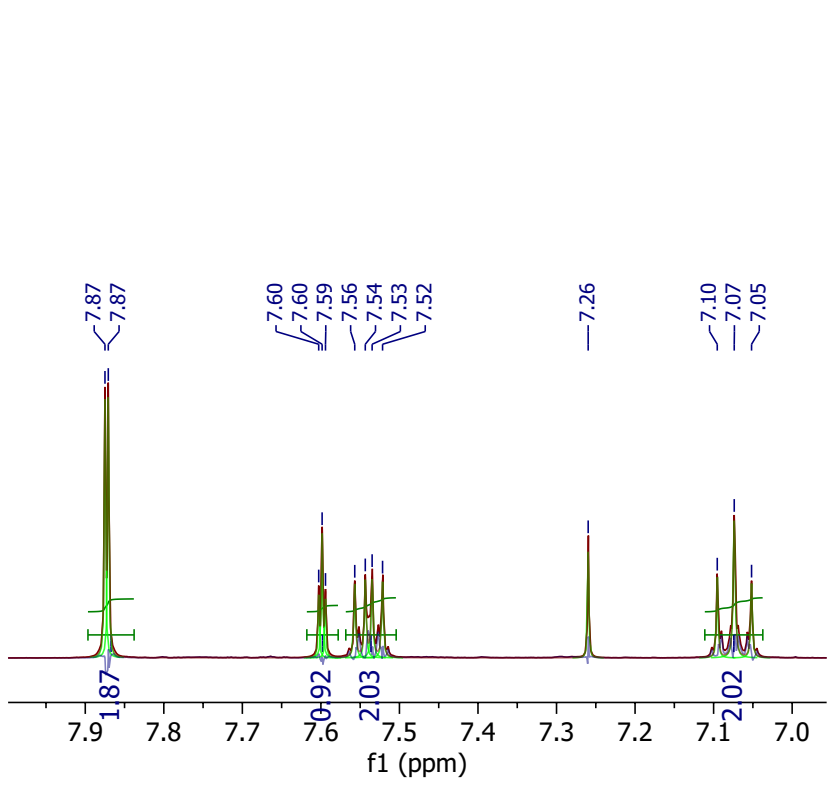

2.90

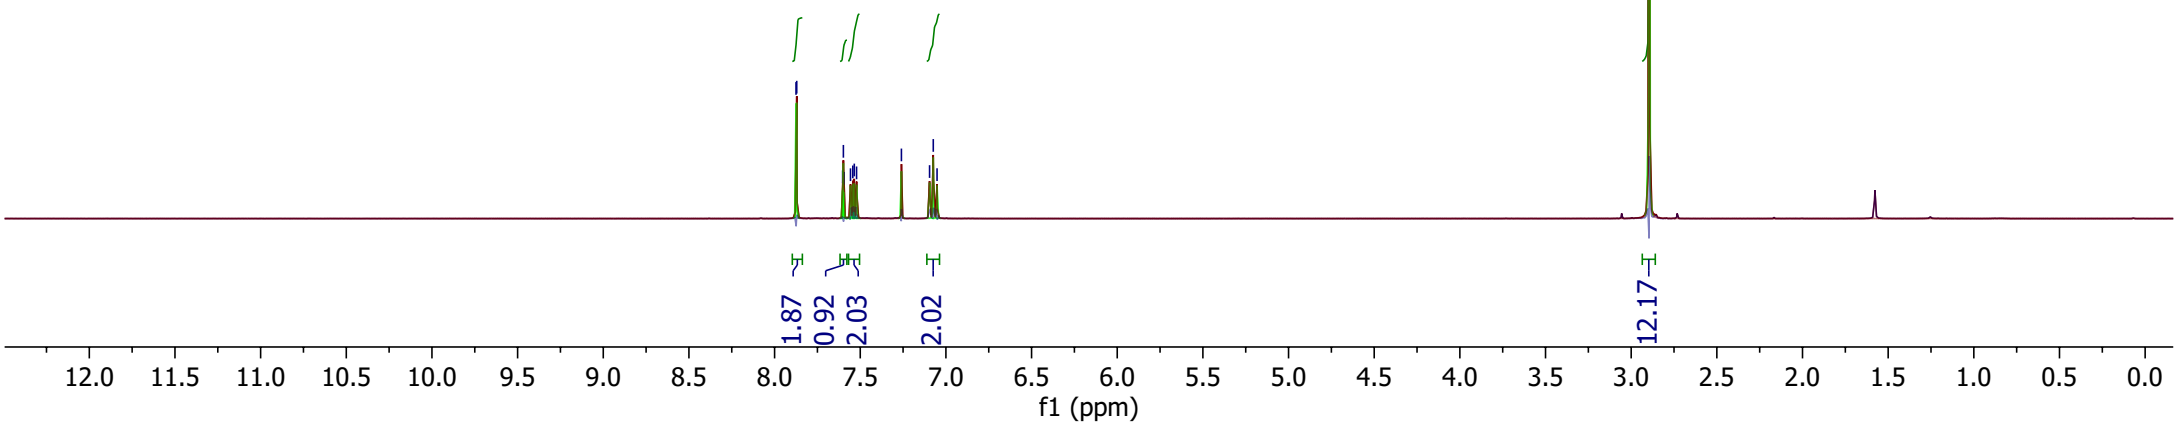



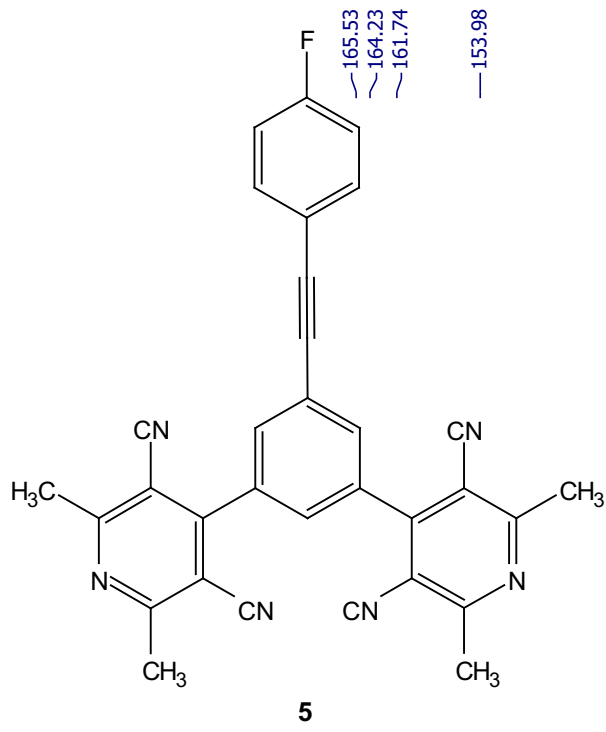

**5**

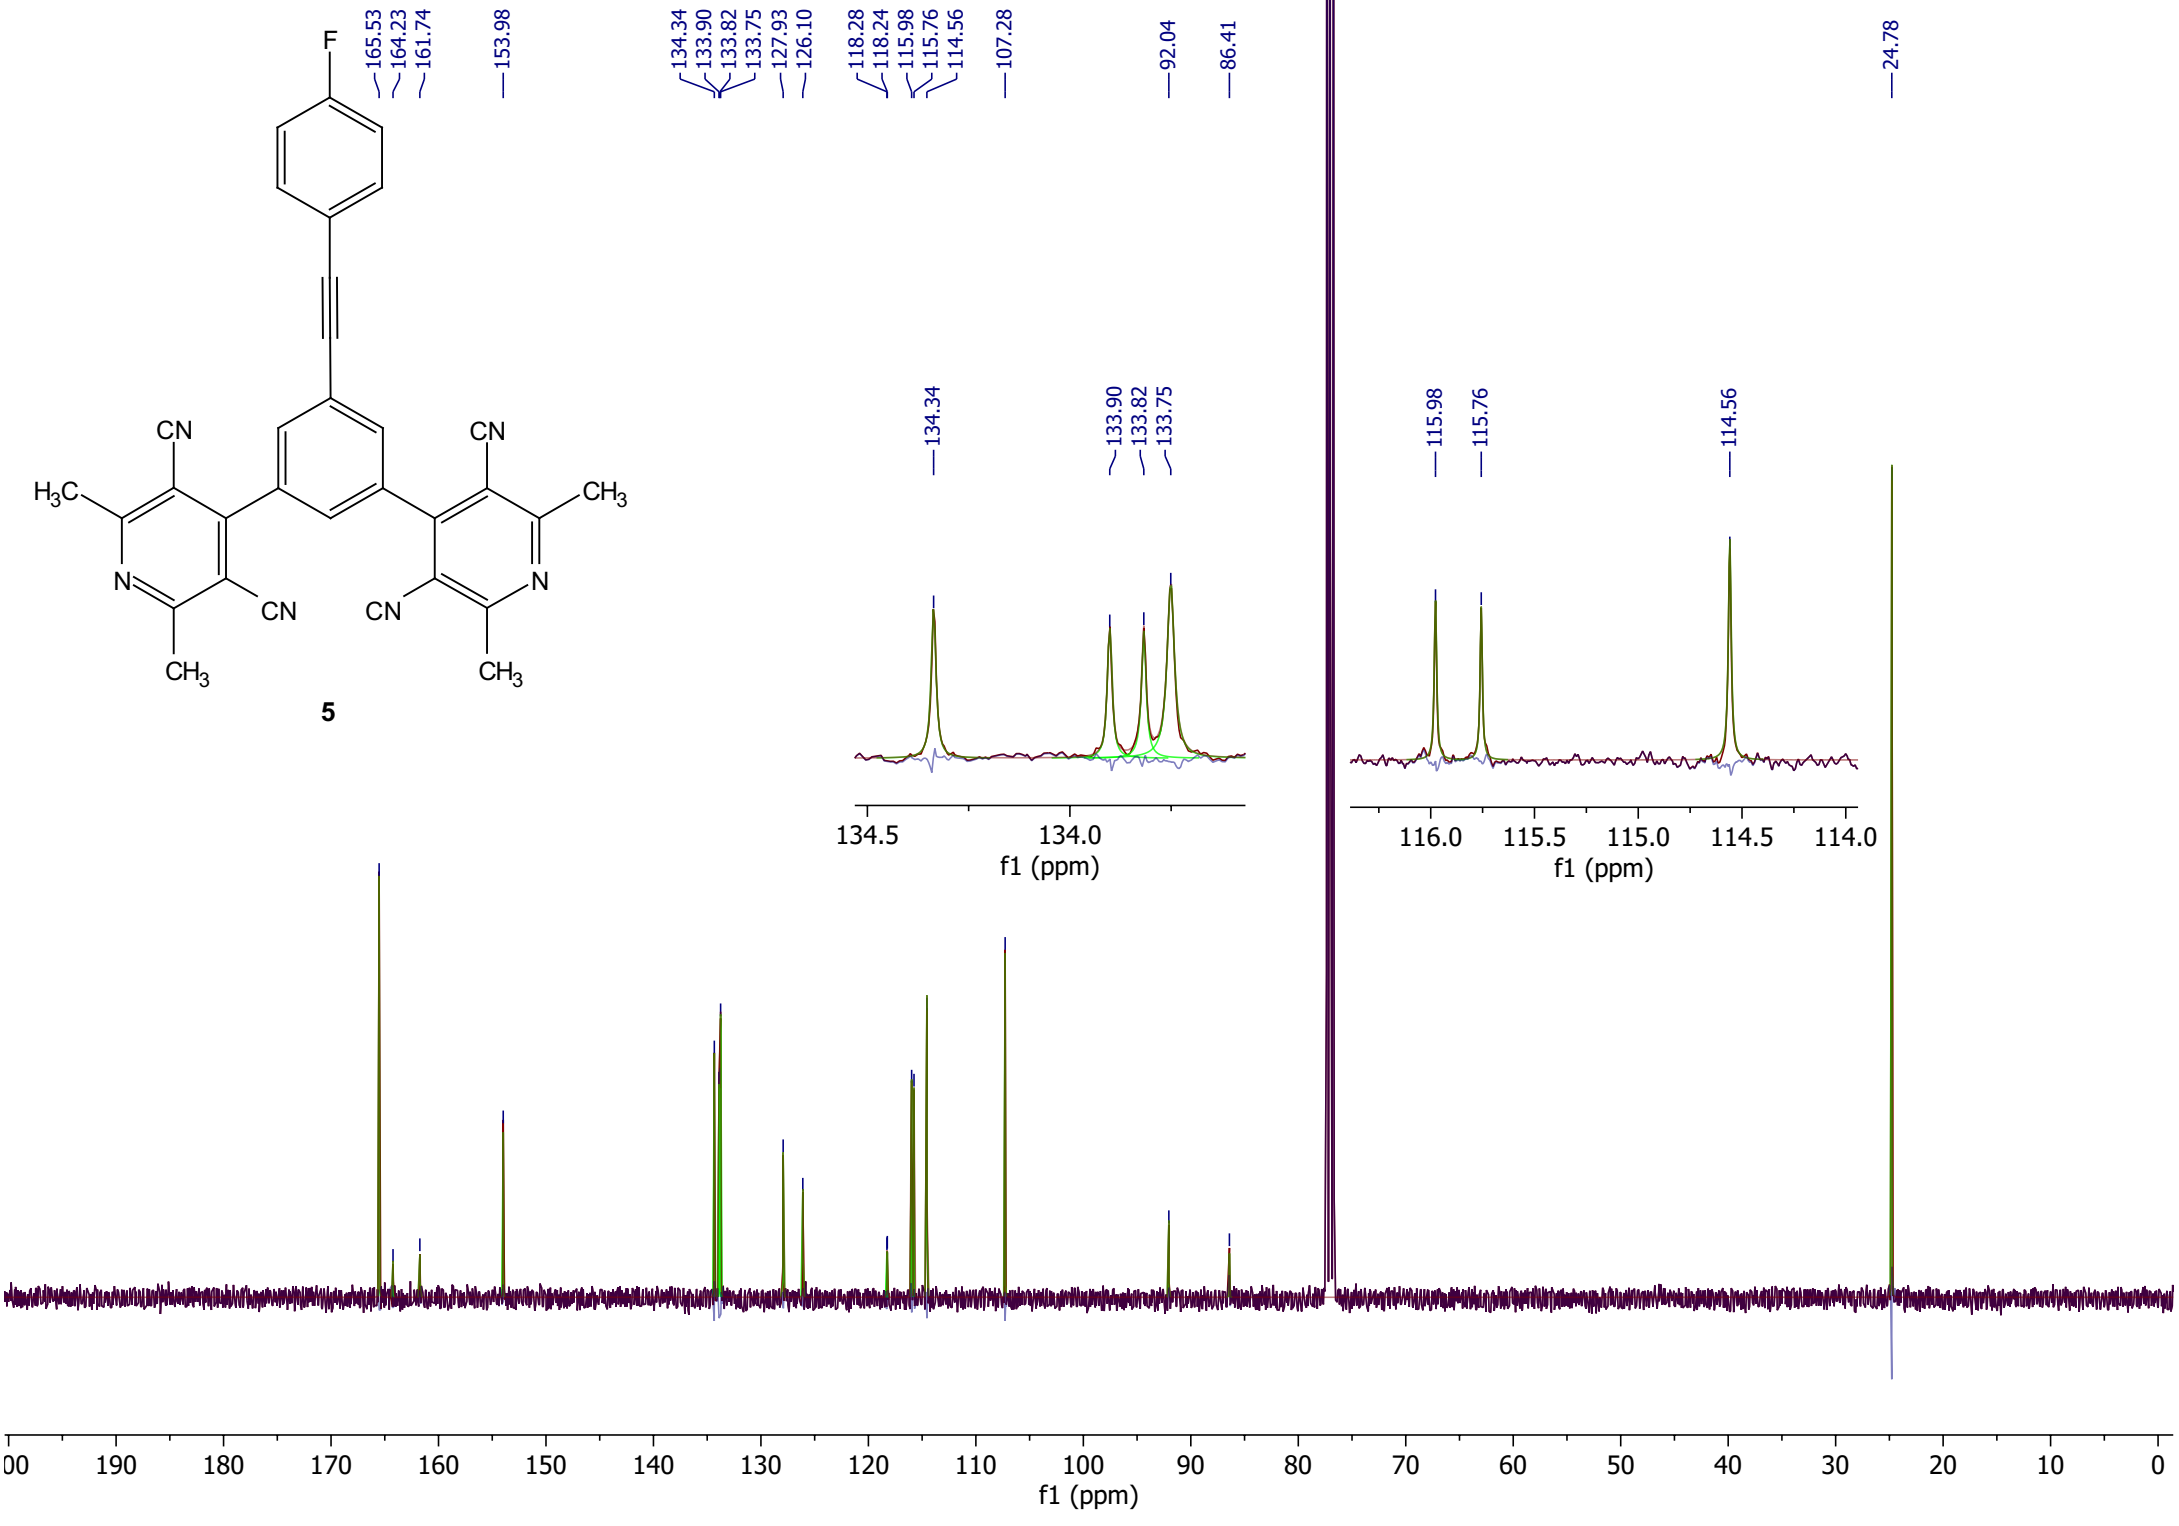

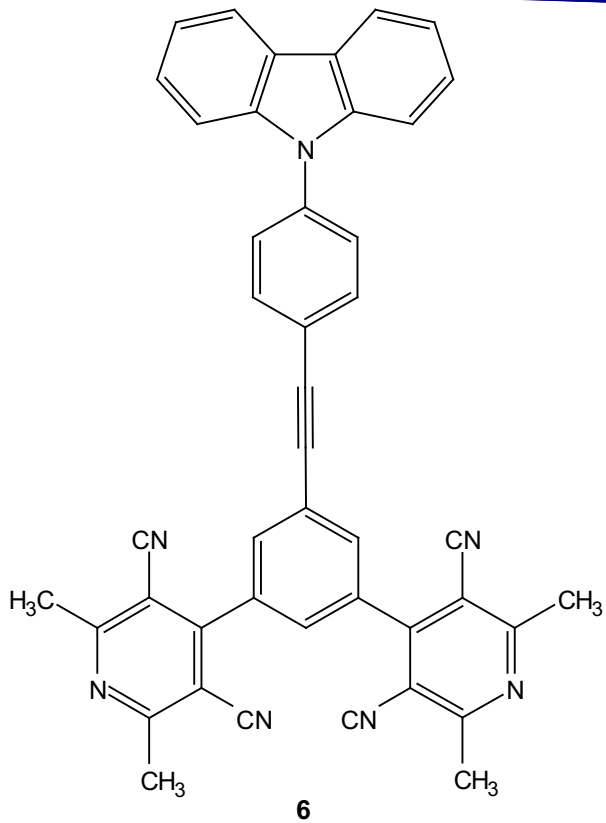

8.16  
8.16  
8.15  
8.14  
8.14  
8.14  
7.94  
7.94  
7.81  
7.80  
7.79  
7.78  
7.64  
7.63  
7.63  
7.63  
7.63  
7.61  
7.61  
7.49  
7.49  
7.48  
7.48  
7.47  
7.46  
7.46  
7.46  
7.45  
7.45  
7.44  
7.44  
7.43  
7.43  
7.42  
7.41  
7.41  
7.33  
7.33  
7.32  
7.32  
7.31  
7.31  
7.31  
7.30  
7.29

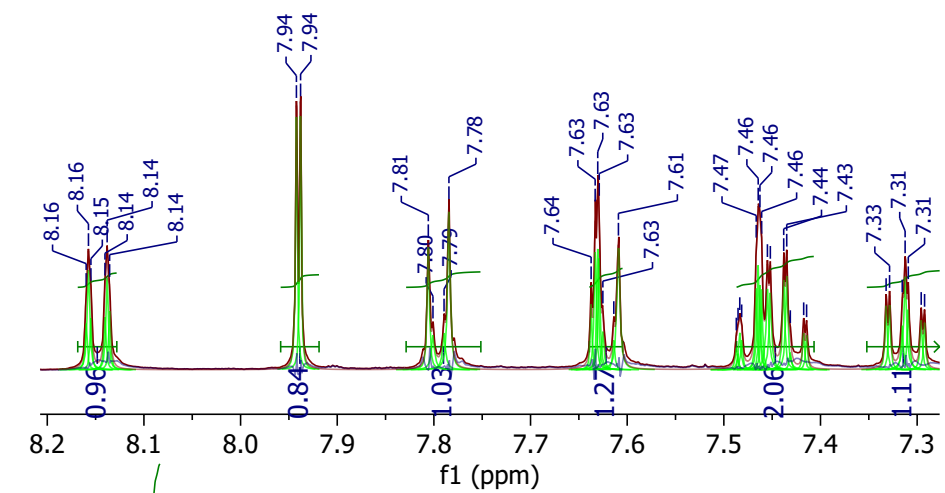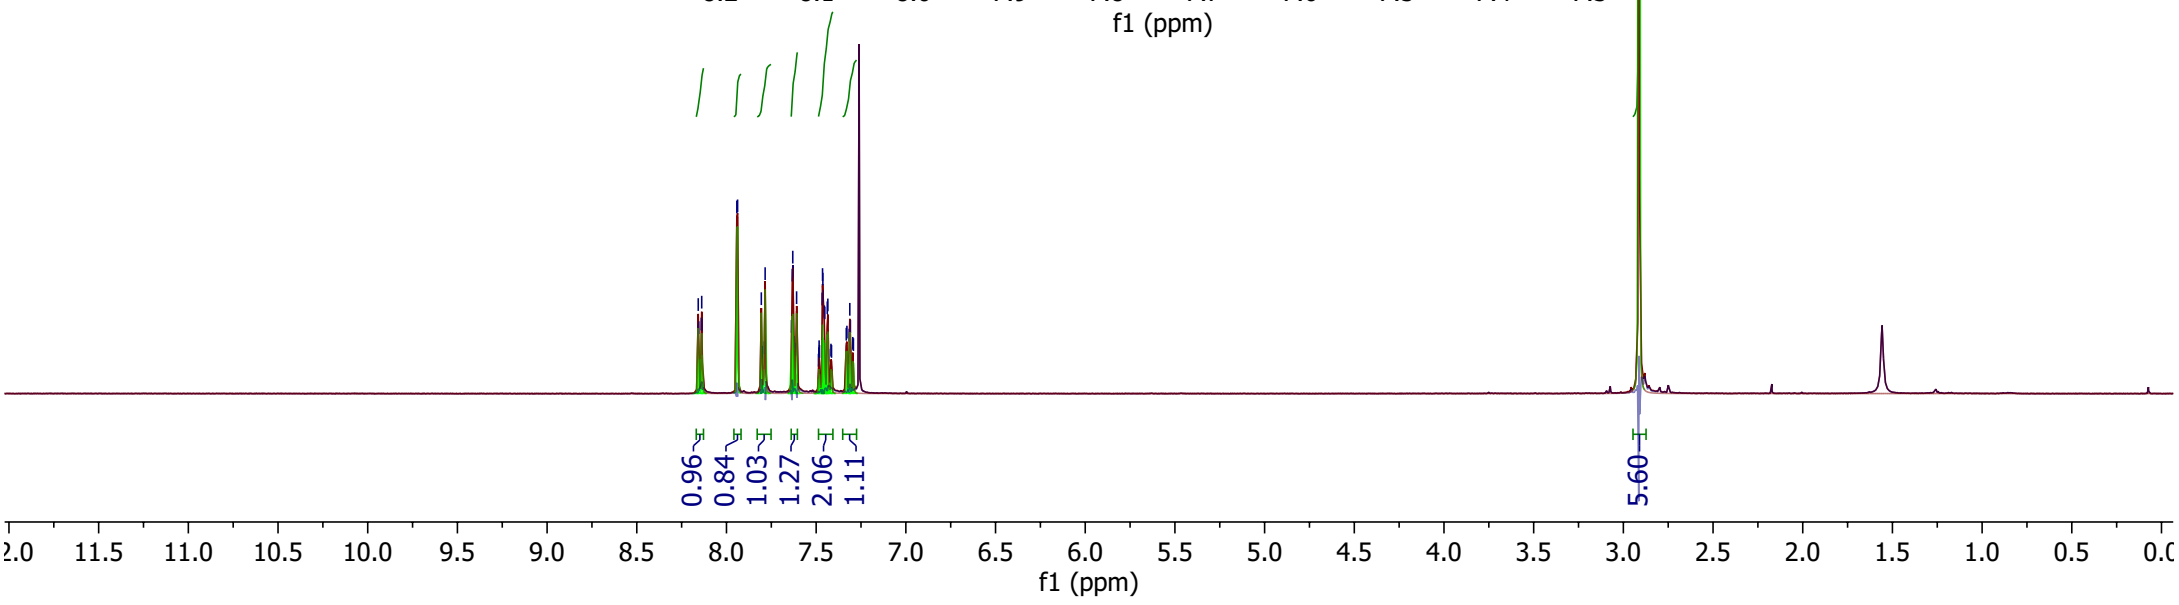

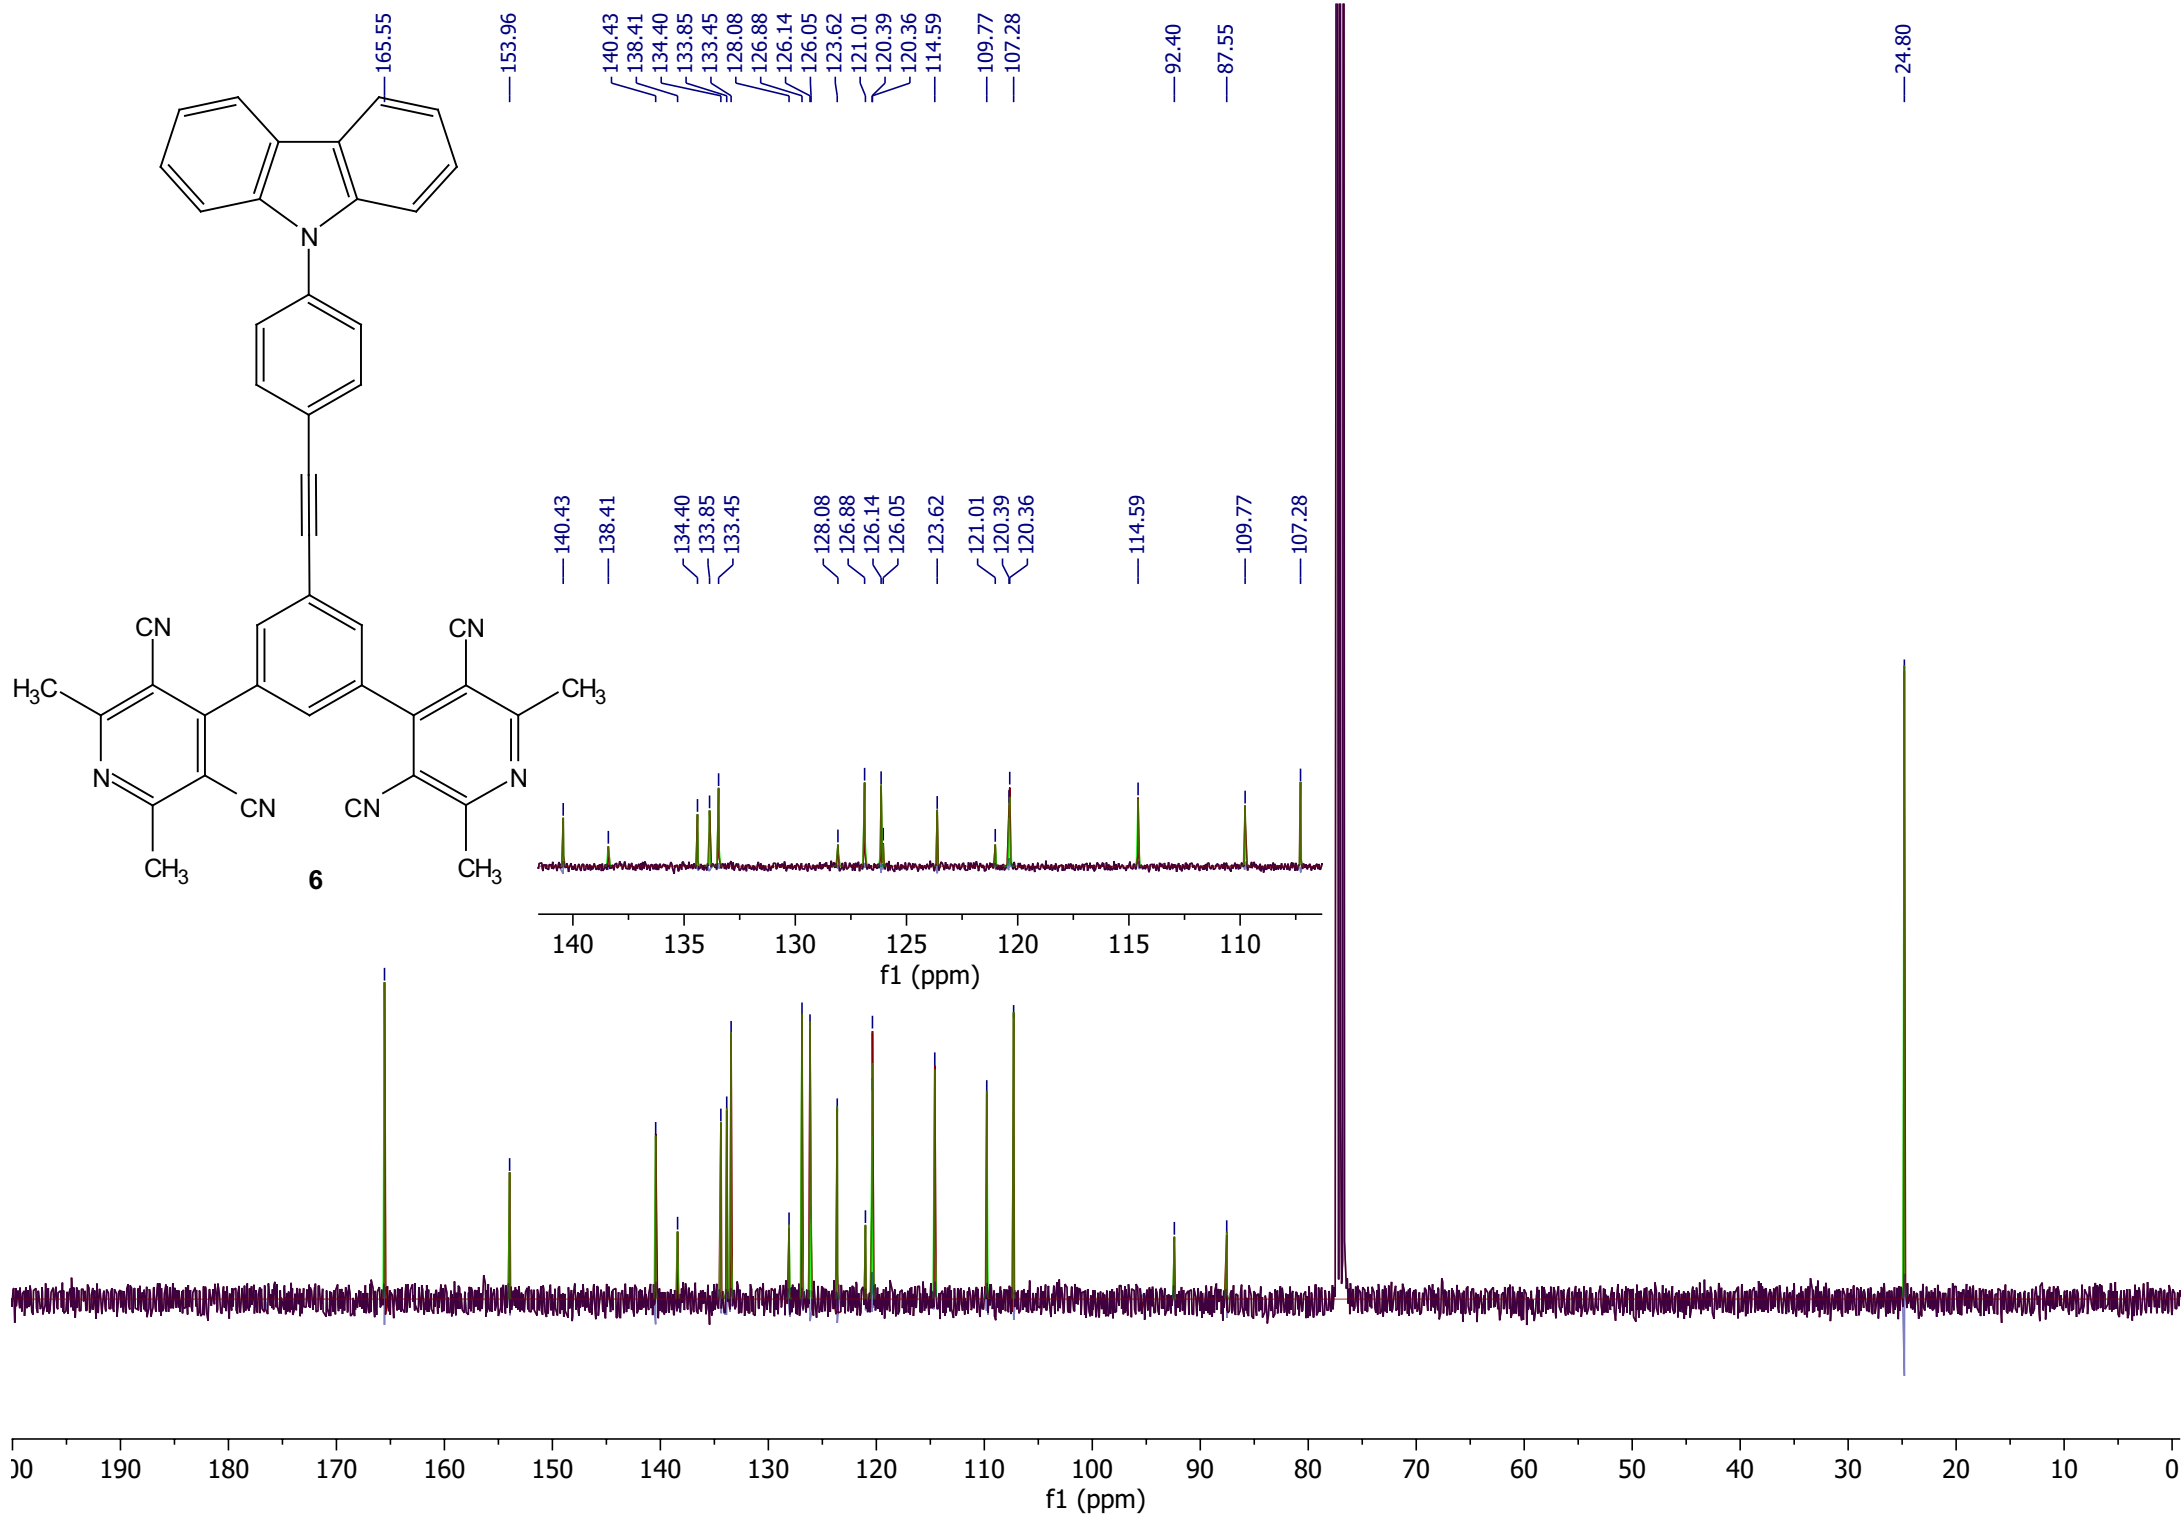

Supplement: d3tc00841j1.pdf [file d3tc00841j1.pdf]
